# Supplementary material
Source: PubMed Central journal article supplement (PMC3895485)

# Lung cancer

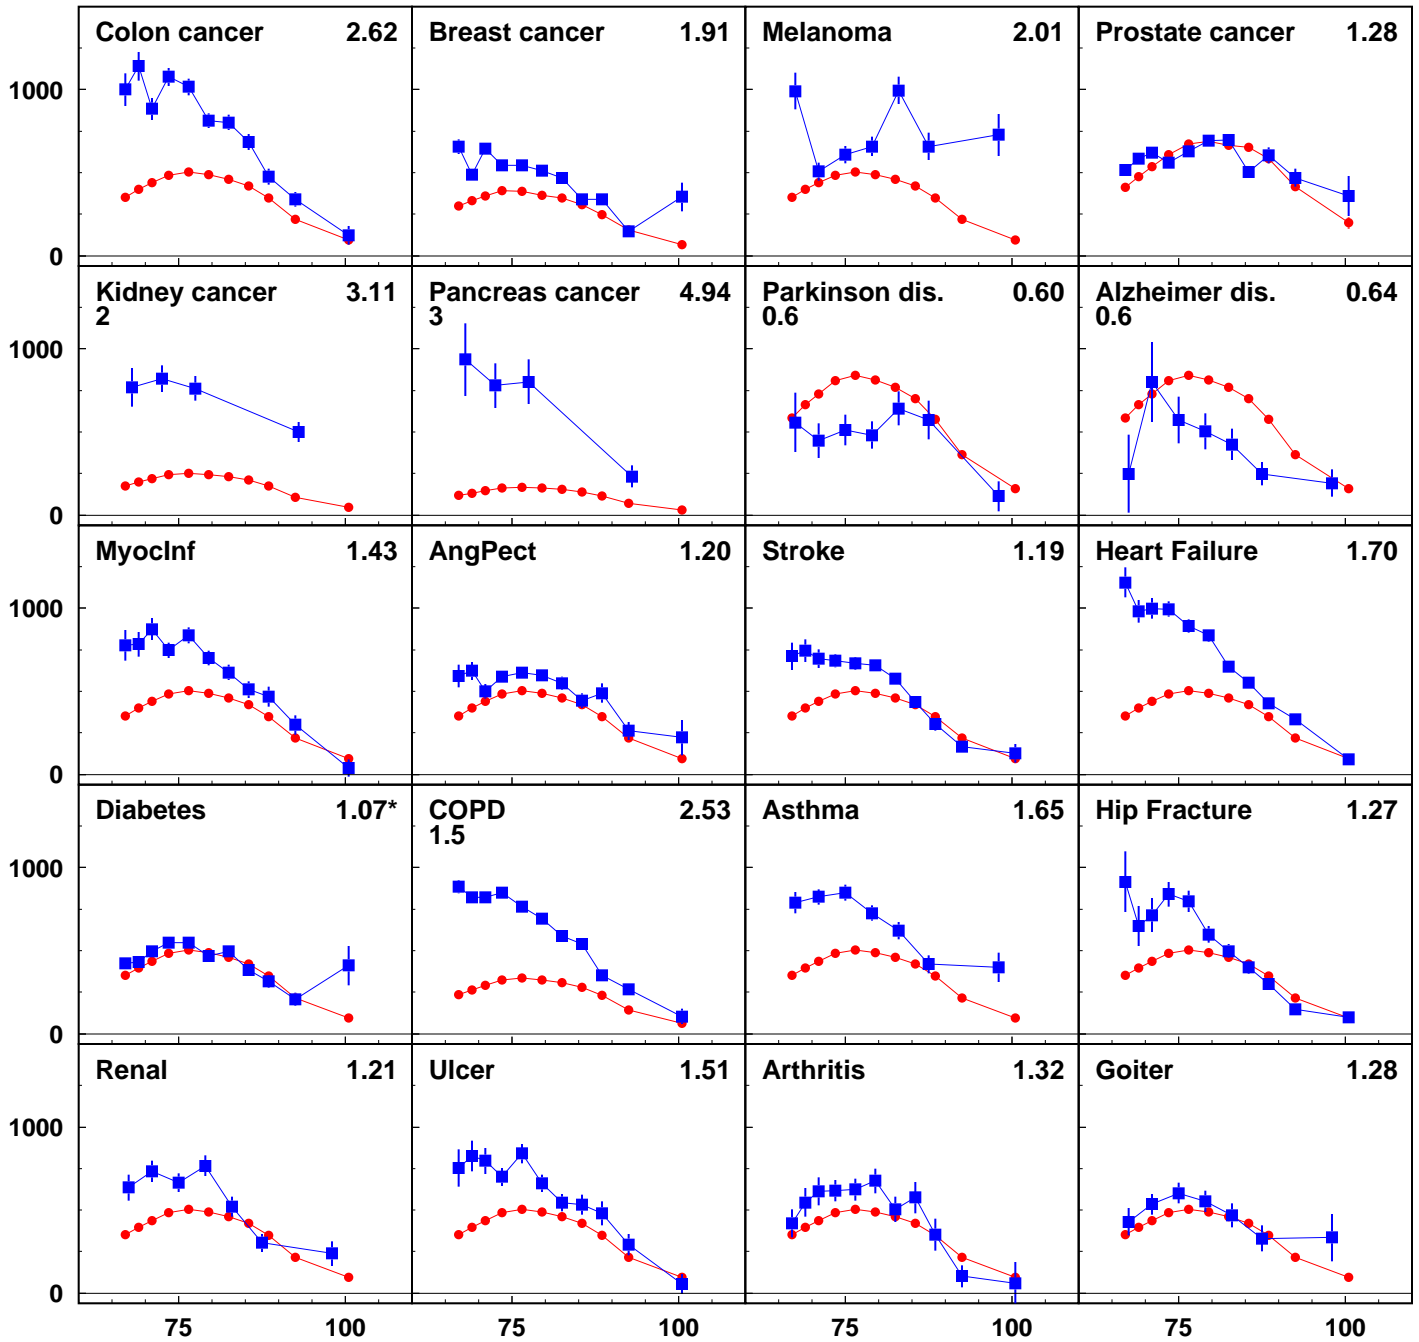

## Colon cancer

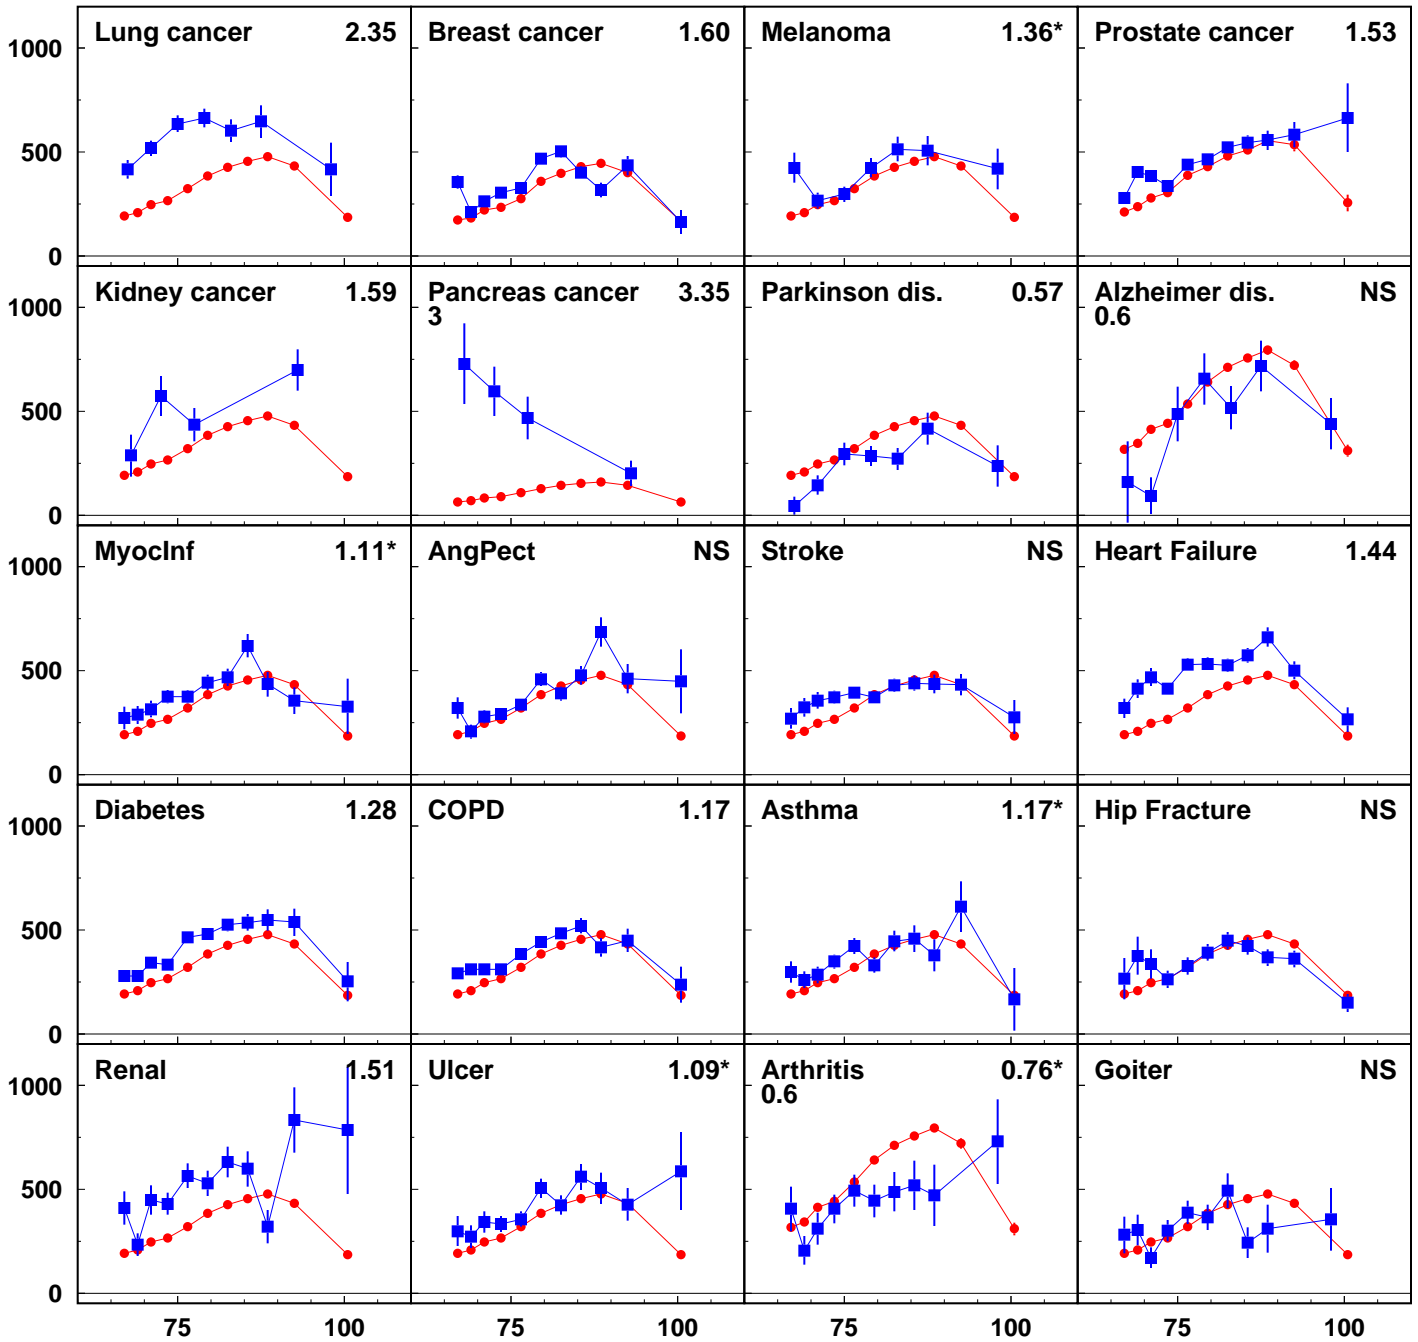

# Breast cancer

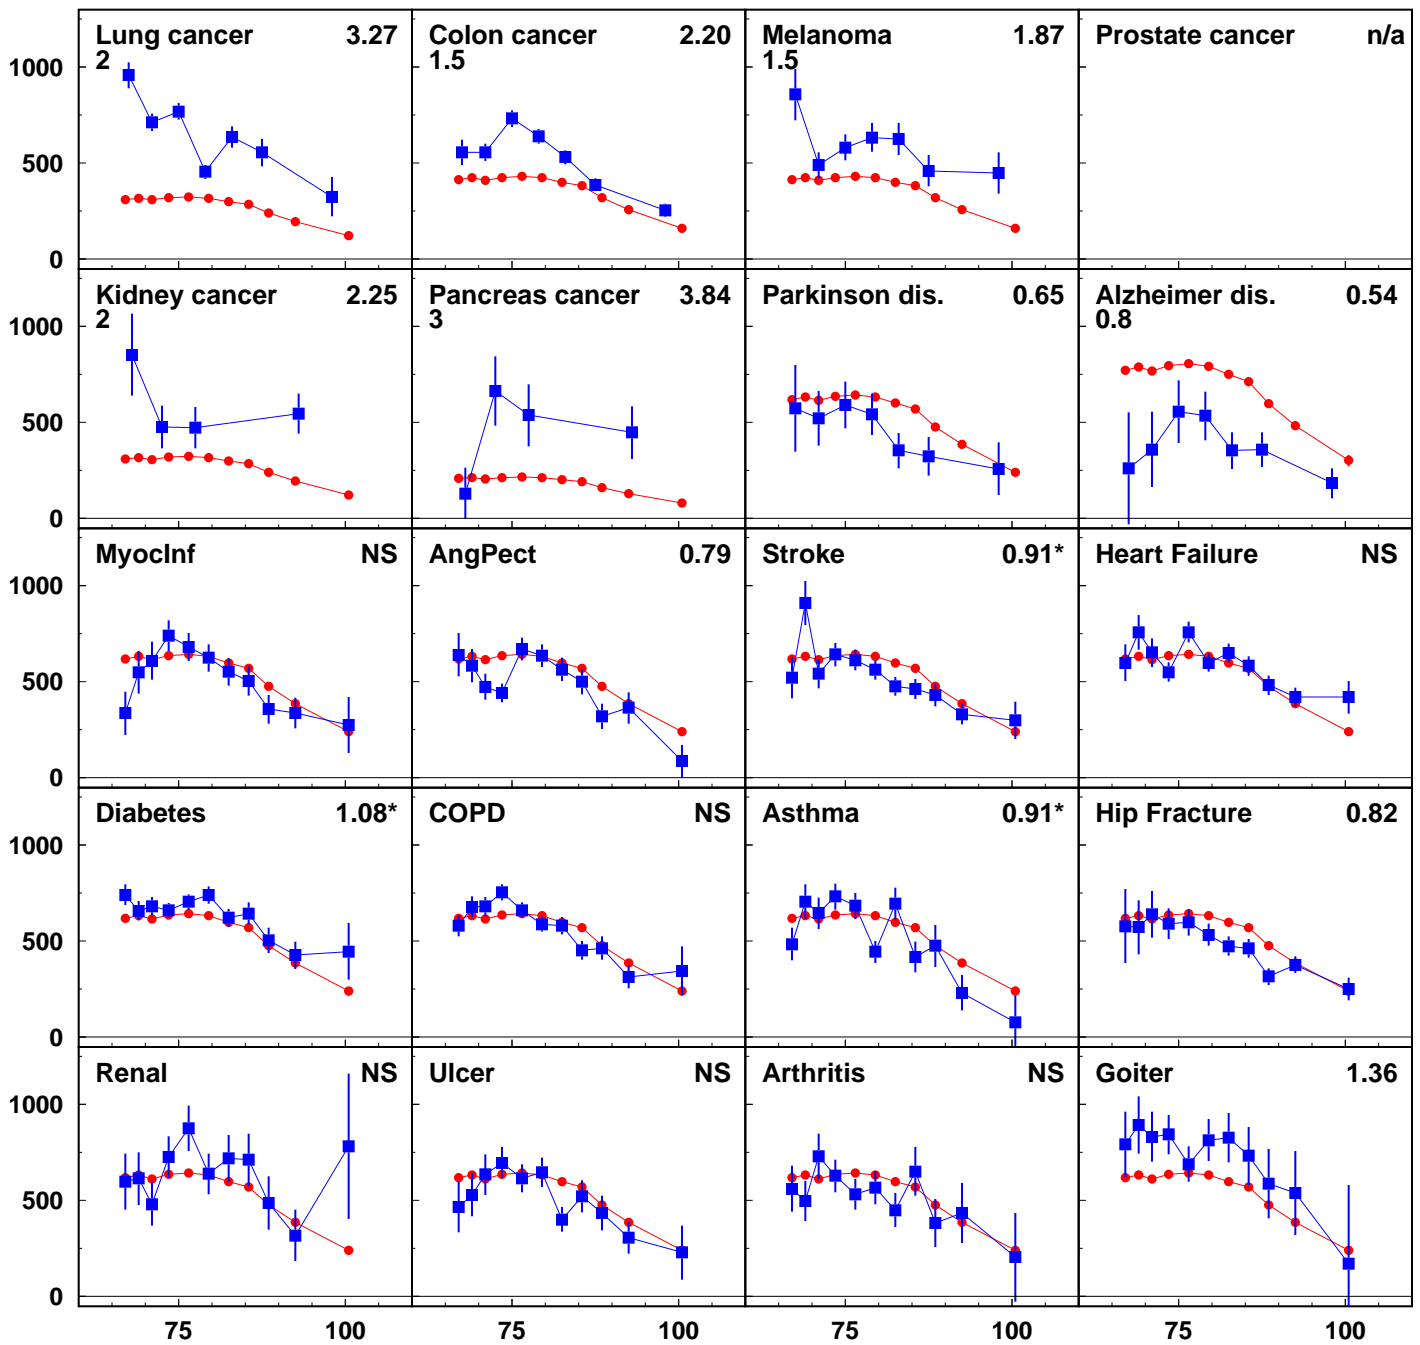

# Melanoma

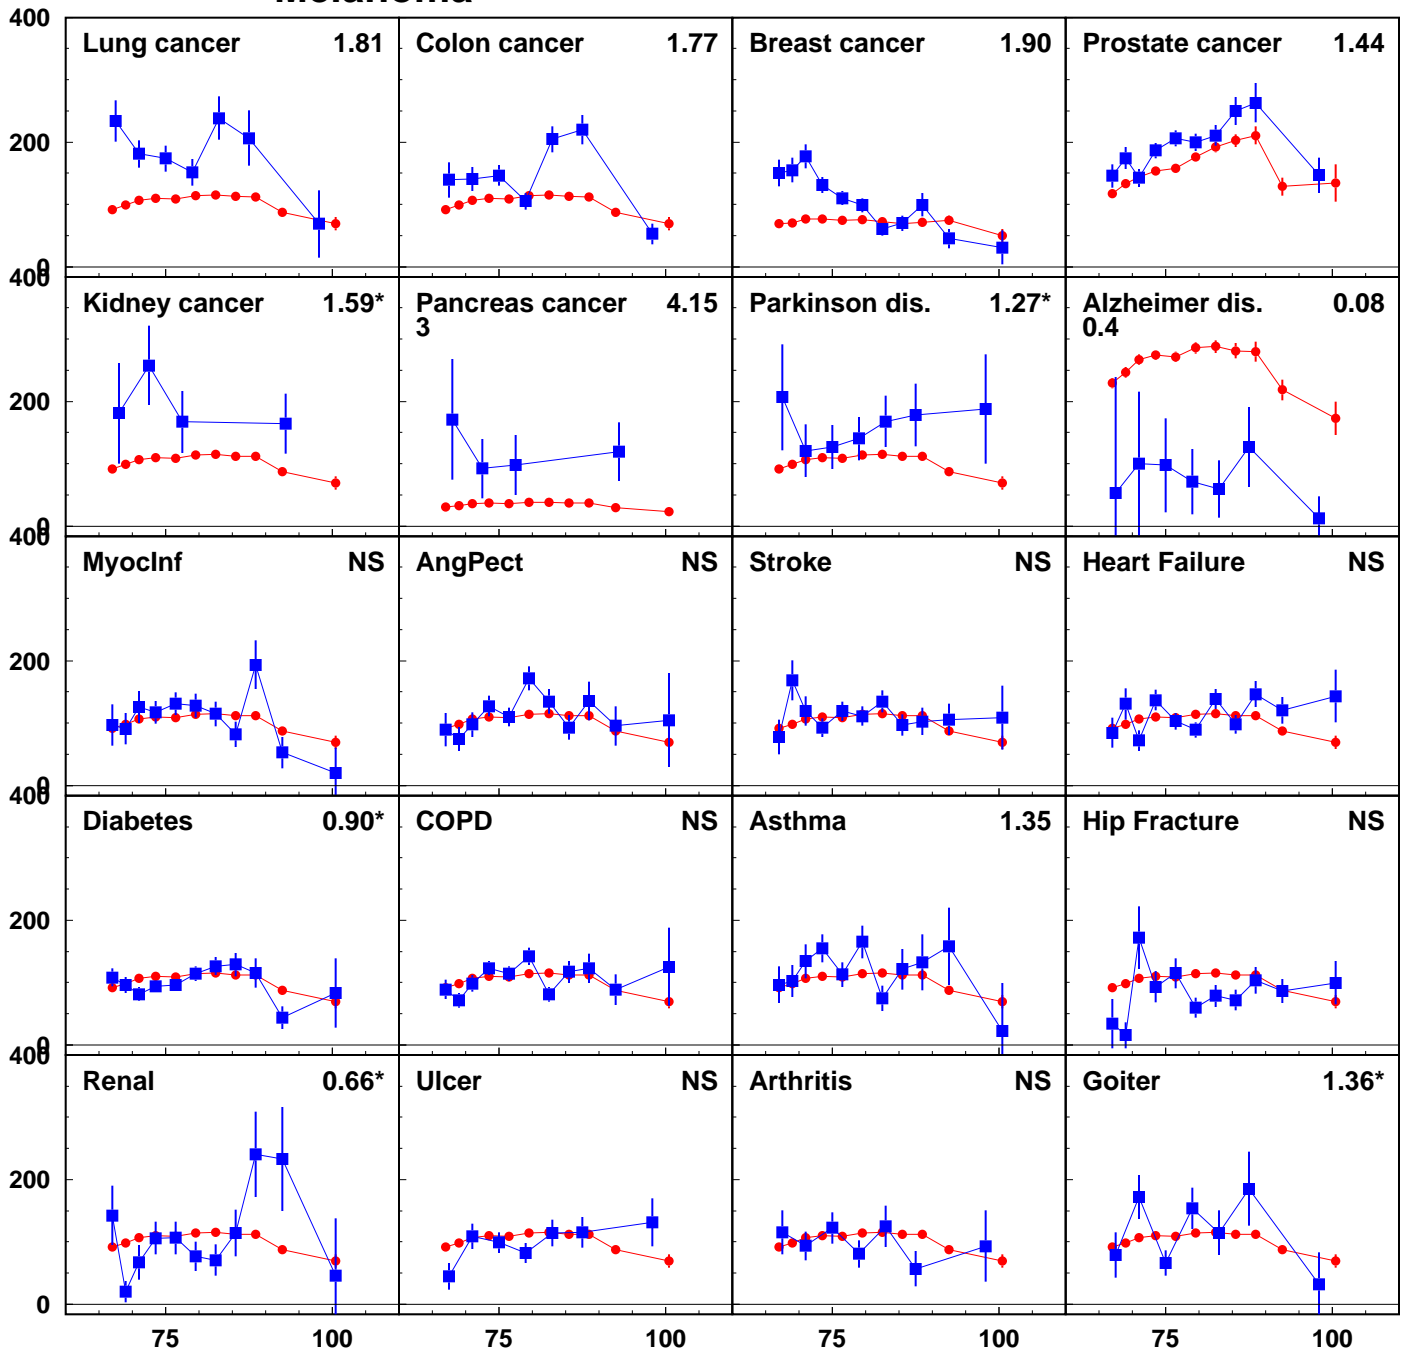

# Prostate cancer

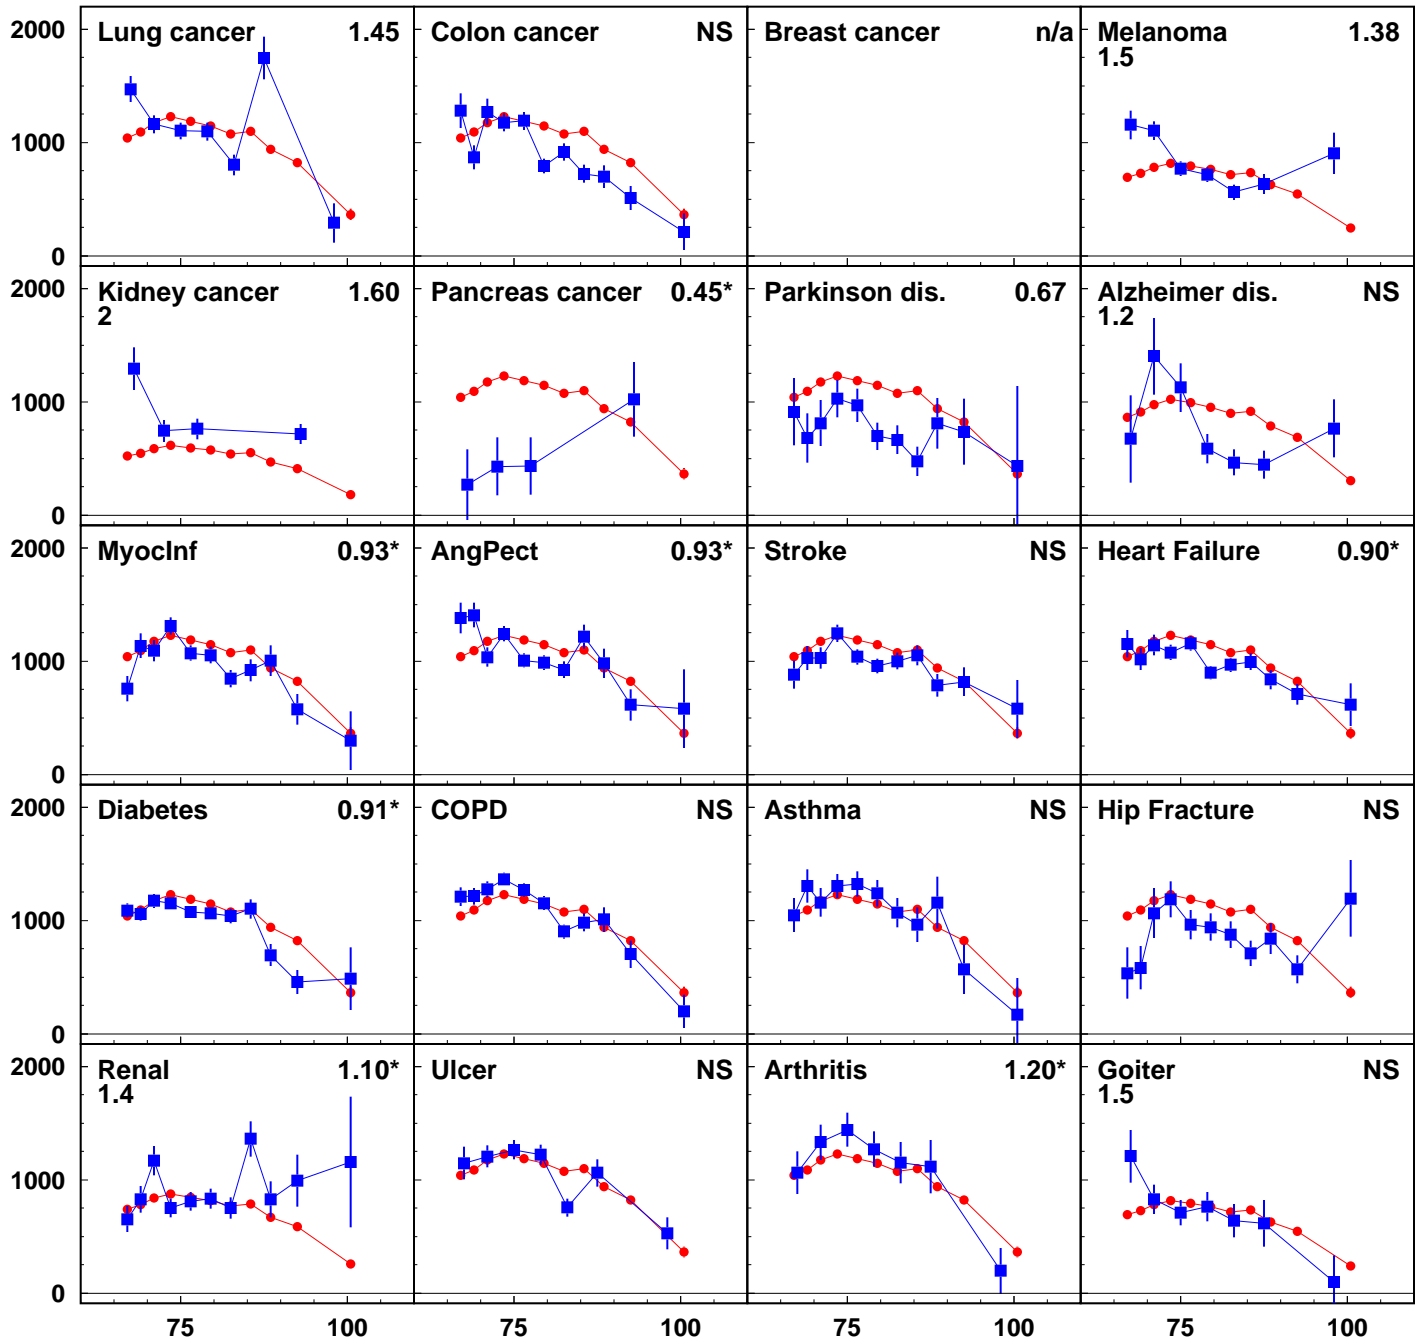

# Kidney cancer

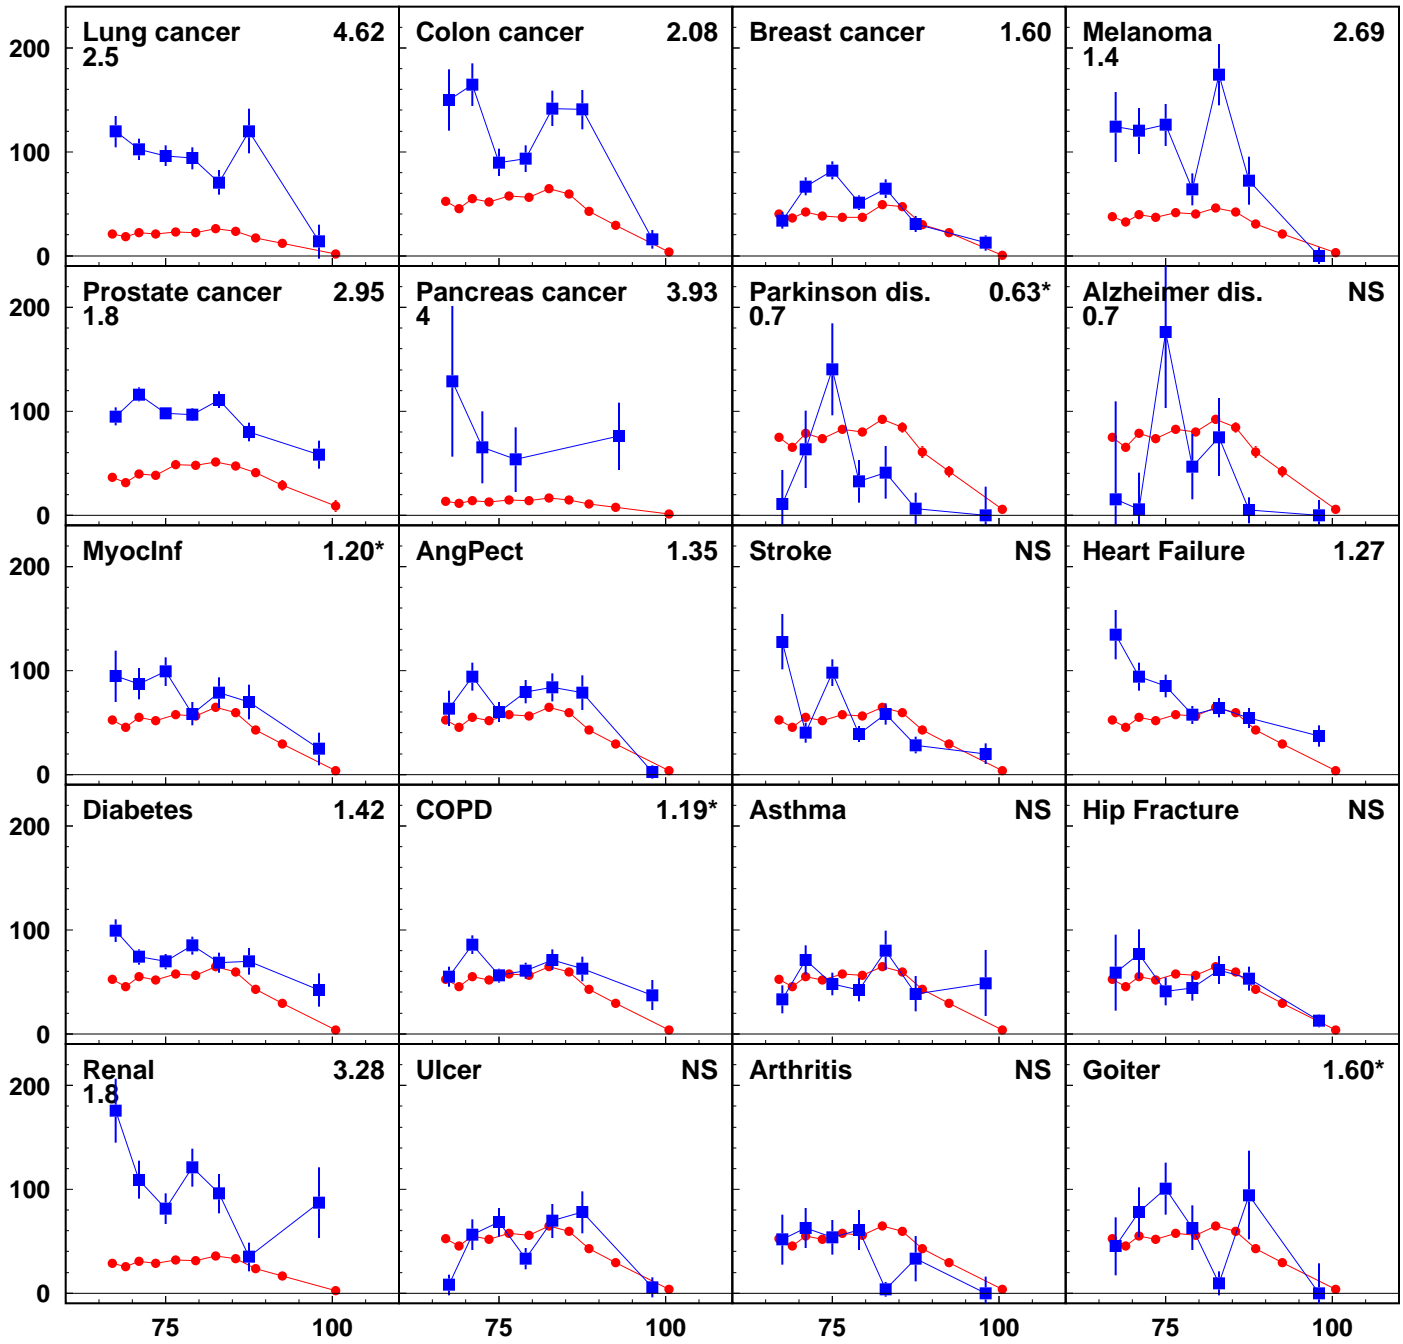

# Pancreas cancer

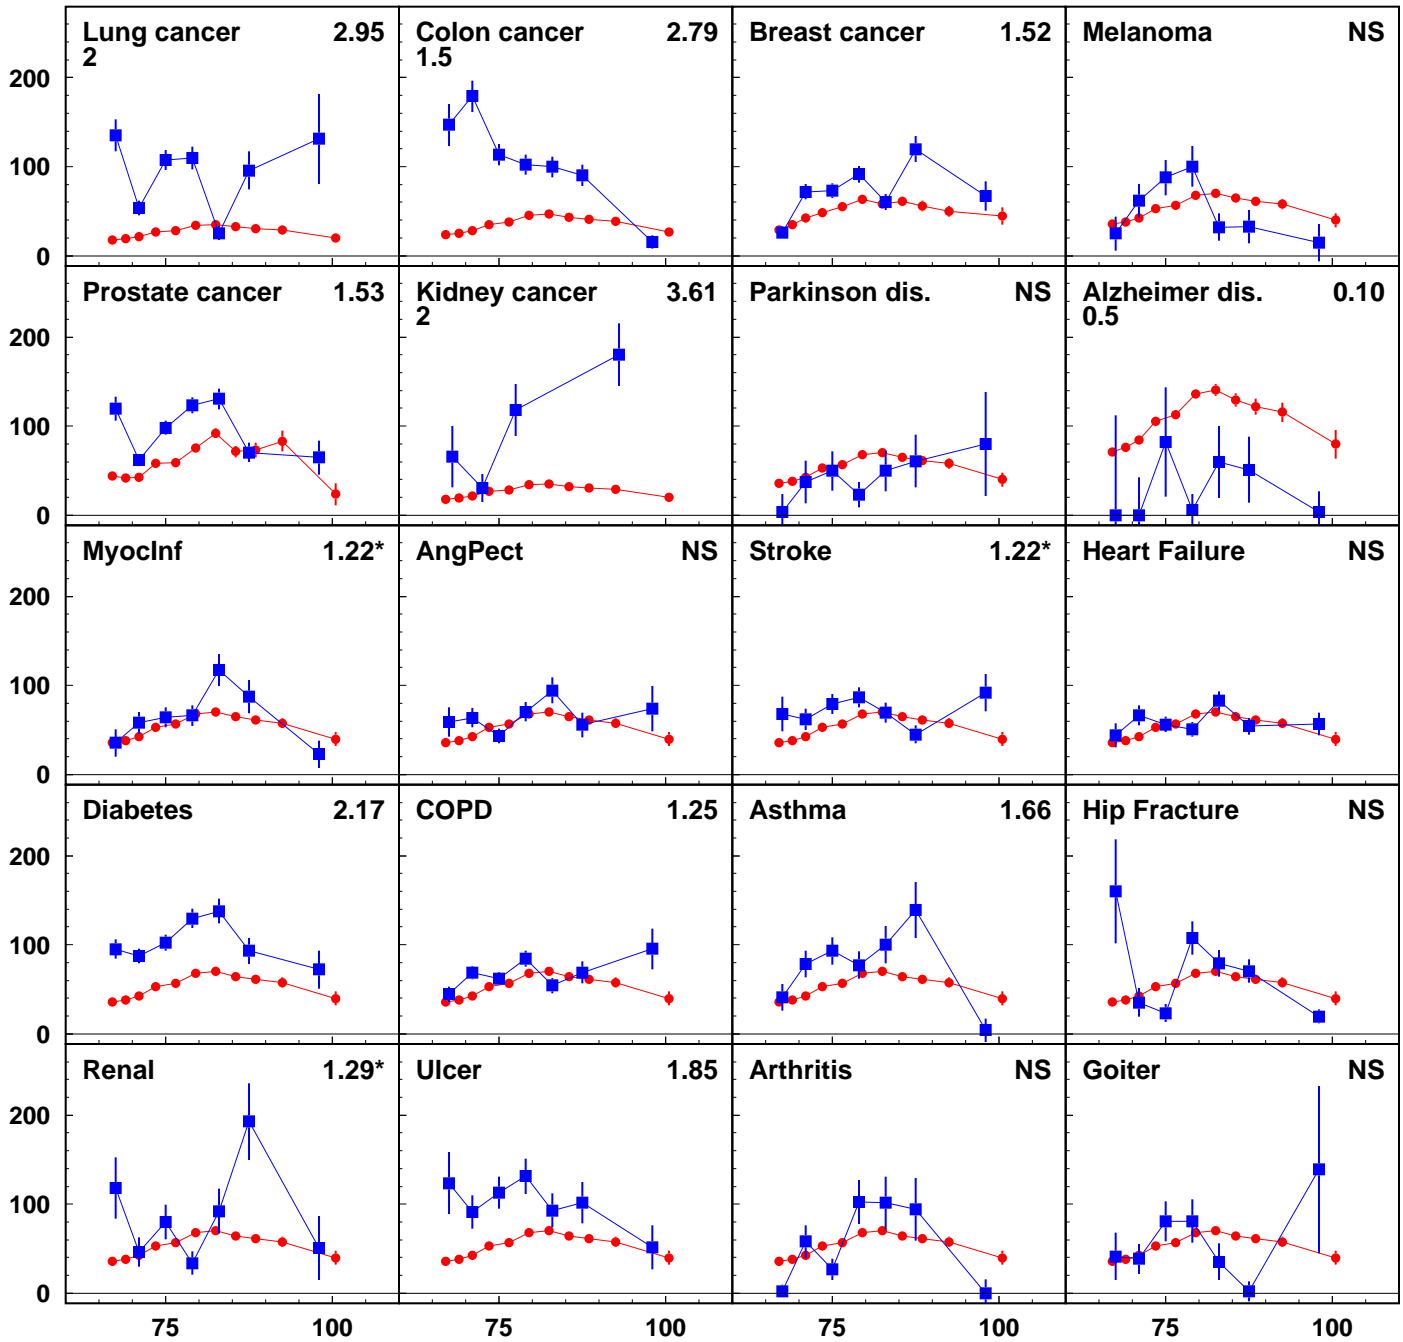

# Parkinson dis.

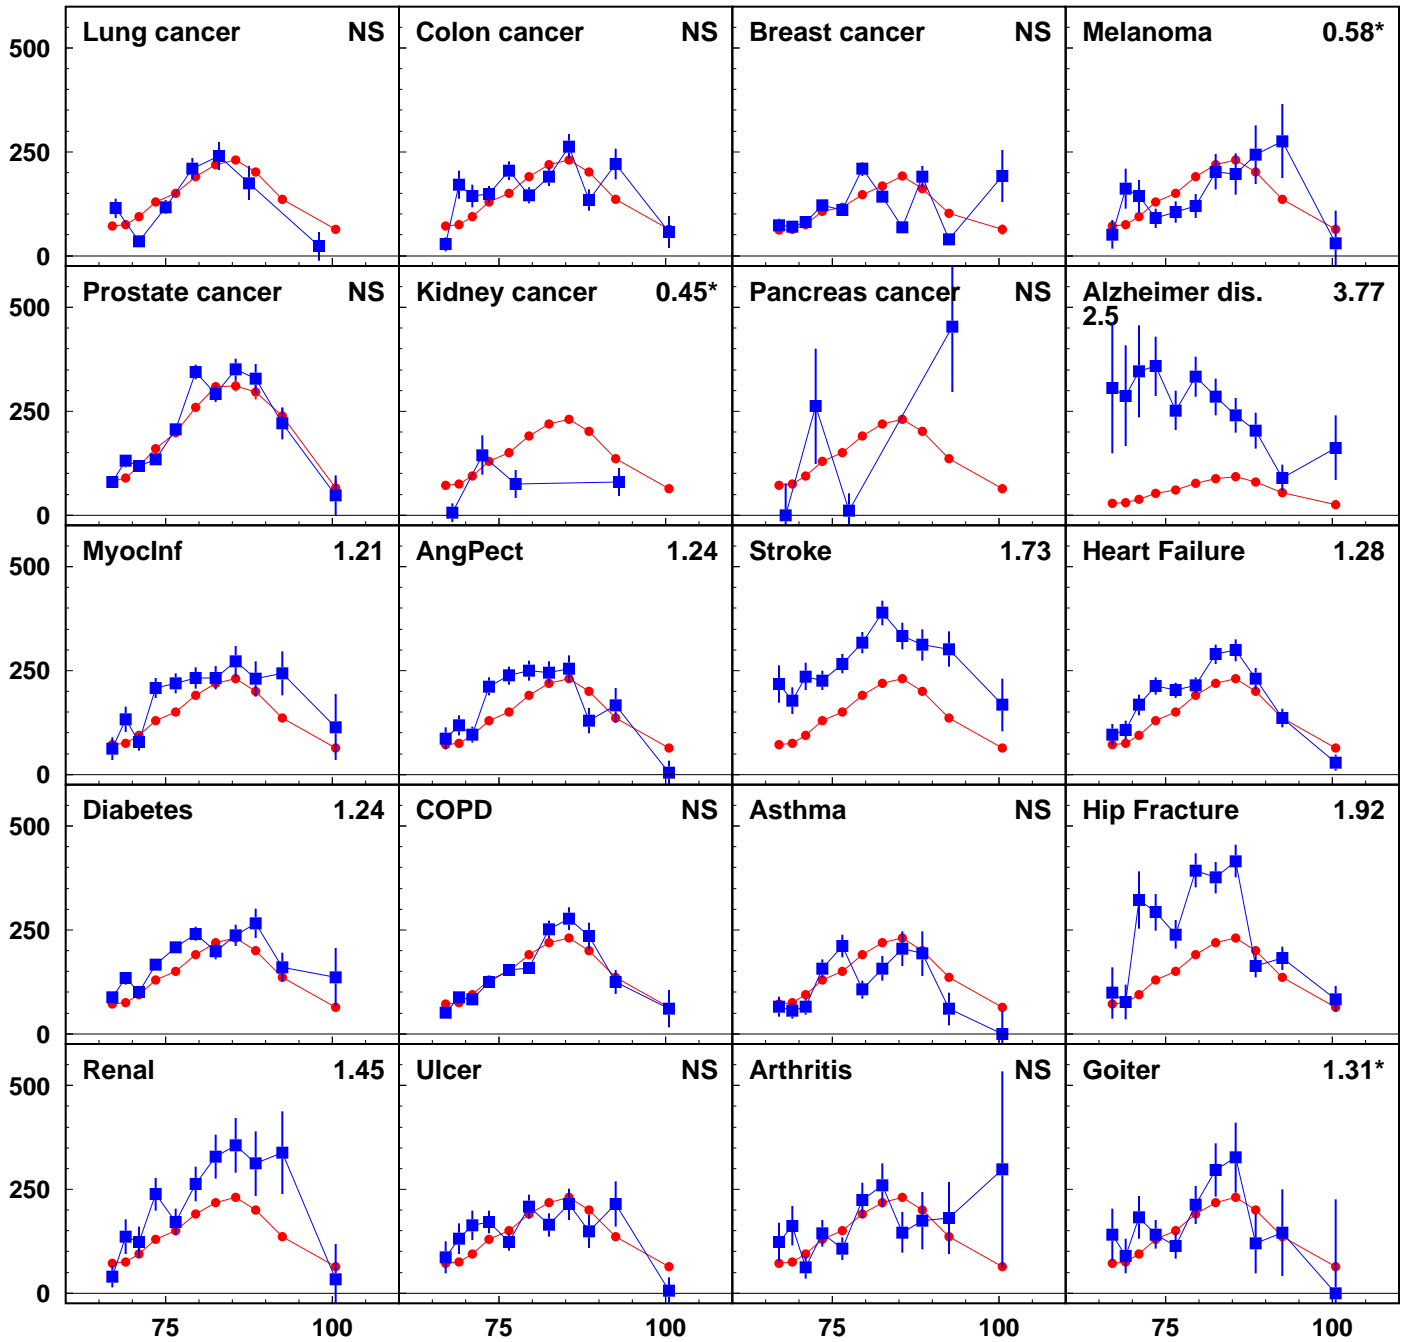



# Alzheimer dis.

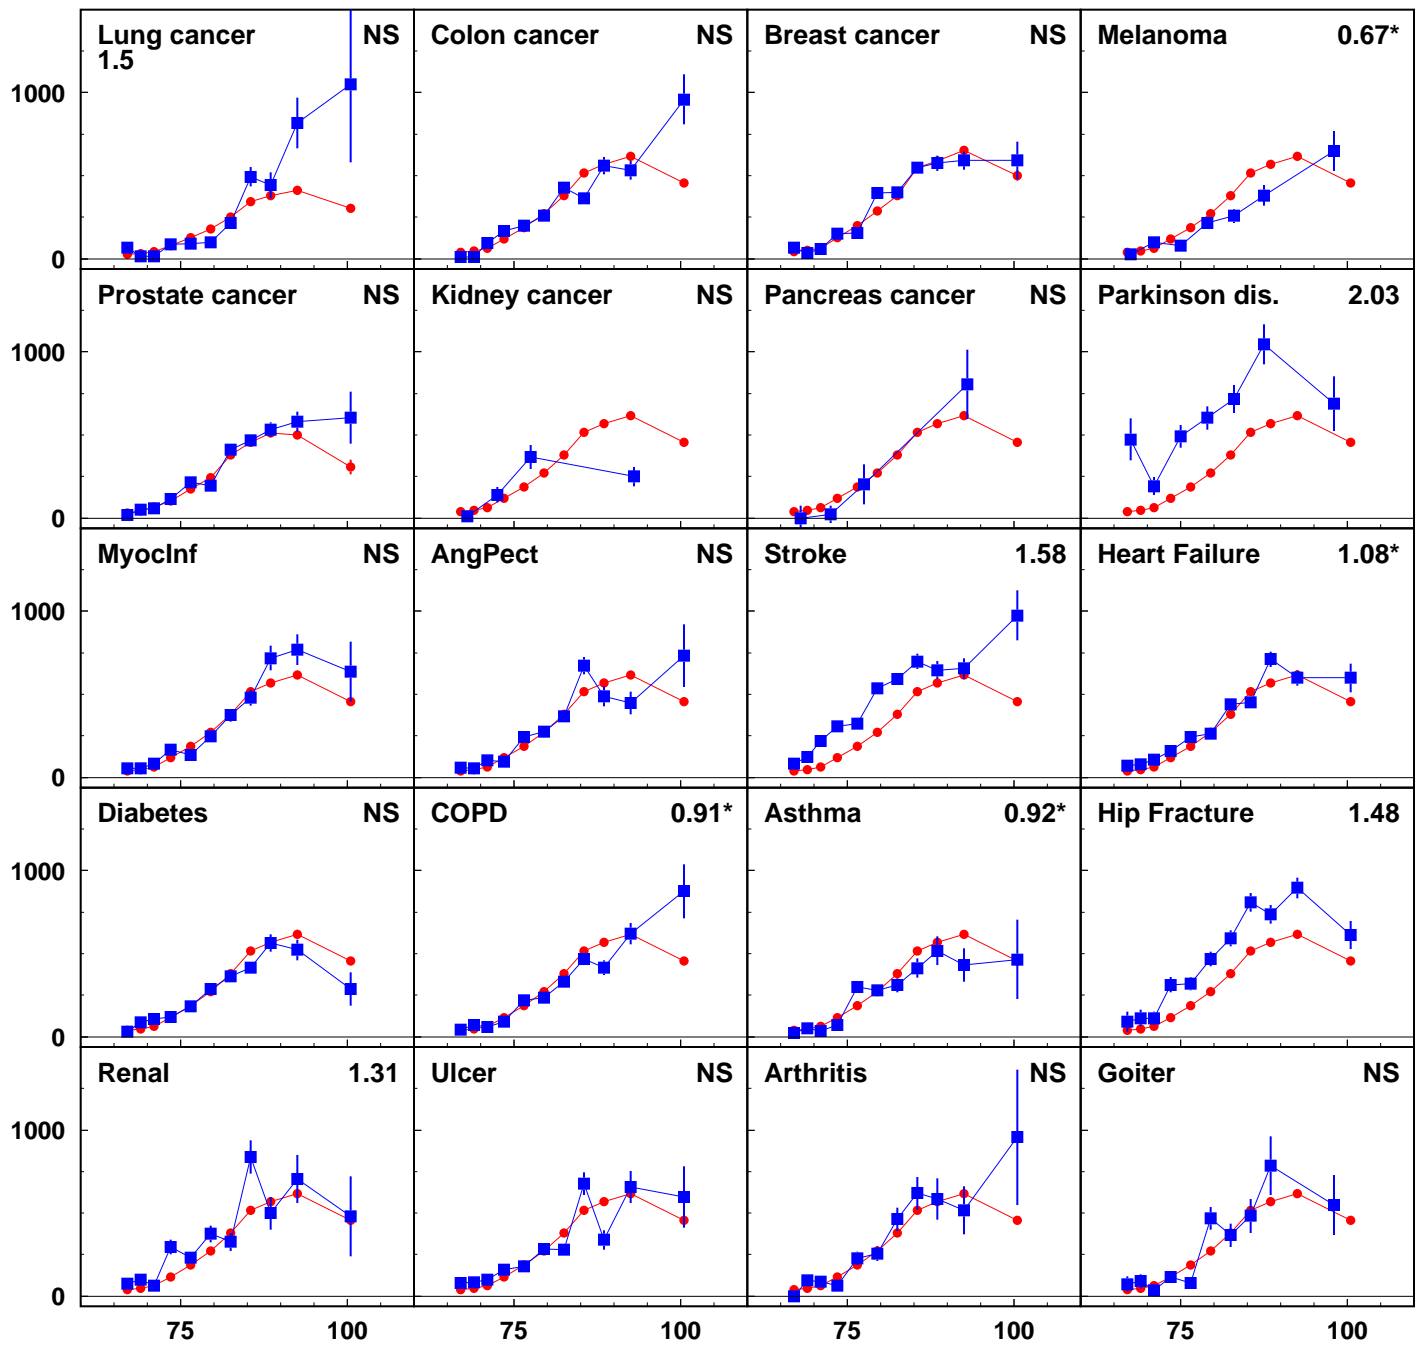

# MyocInf

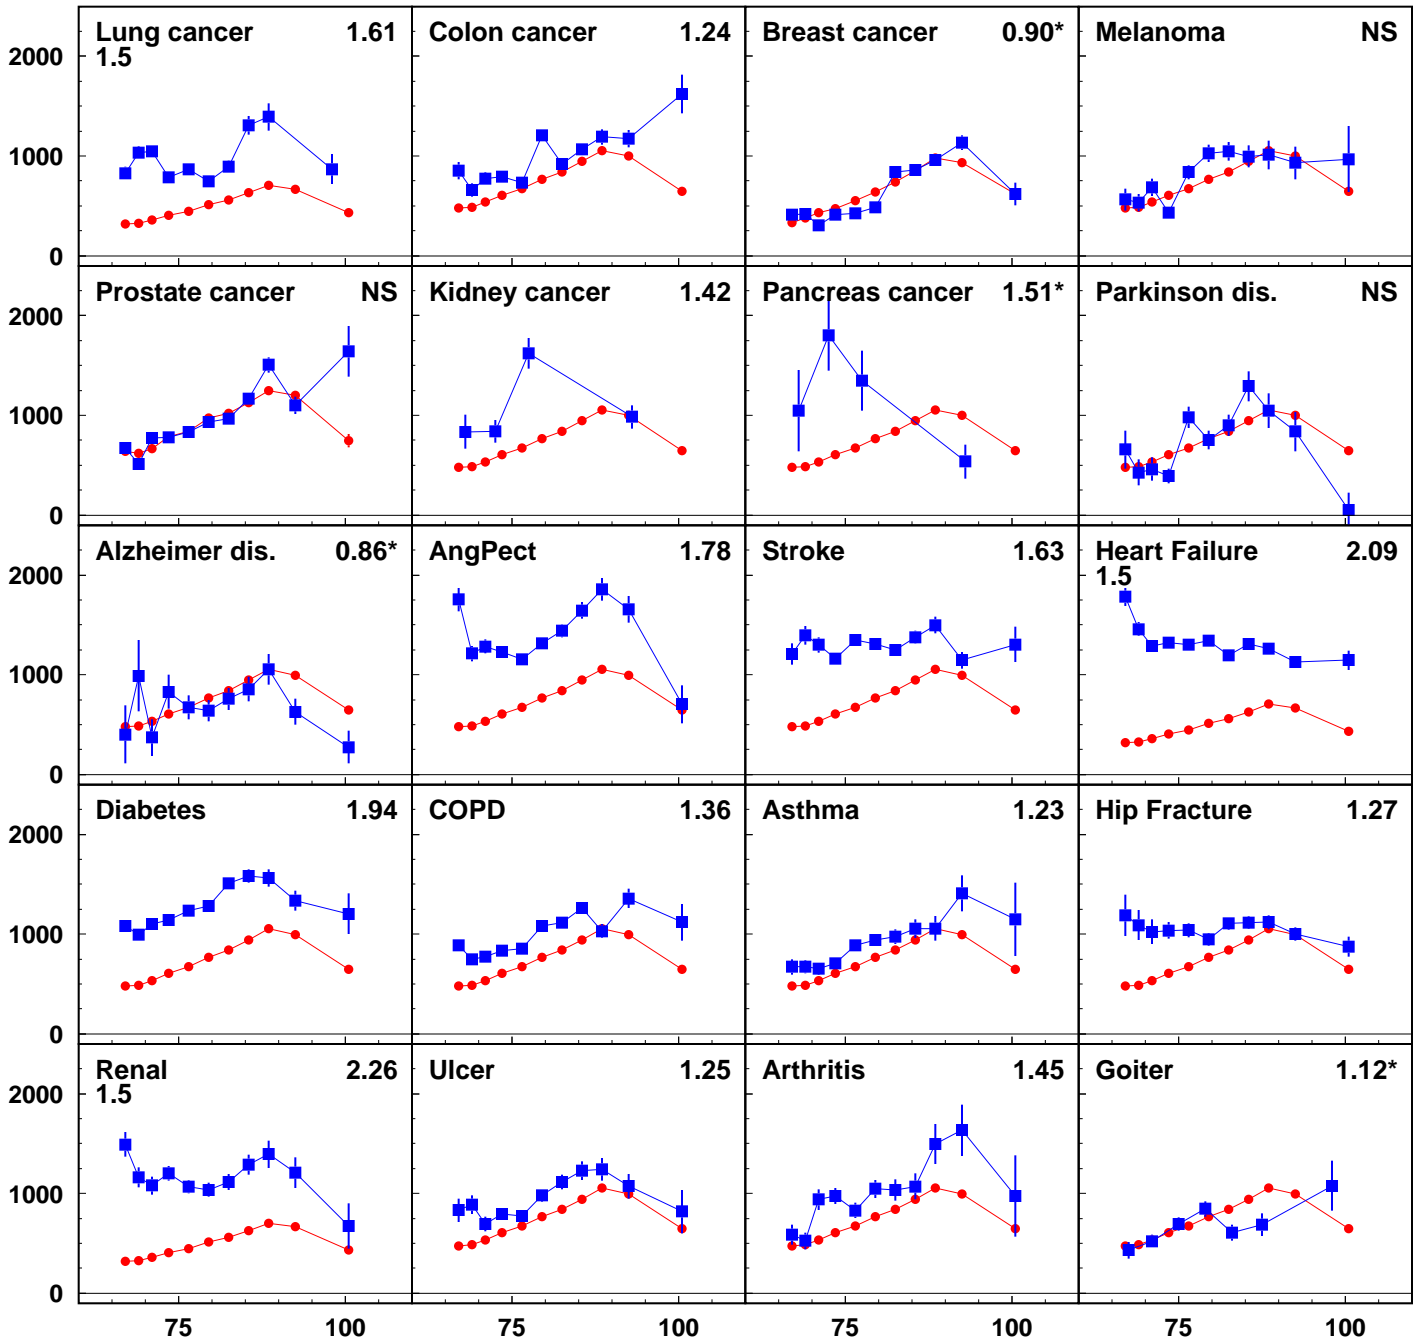

# AngPect

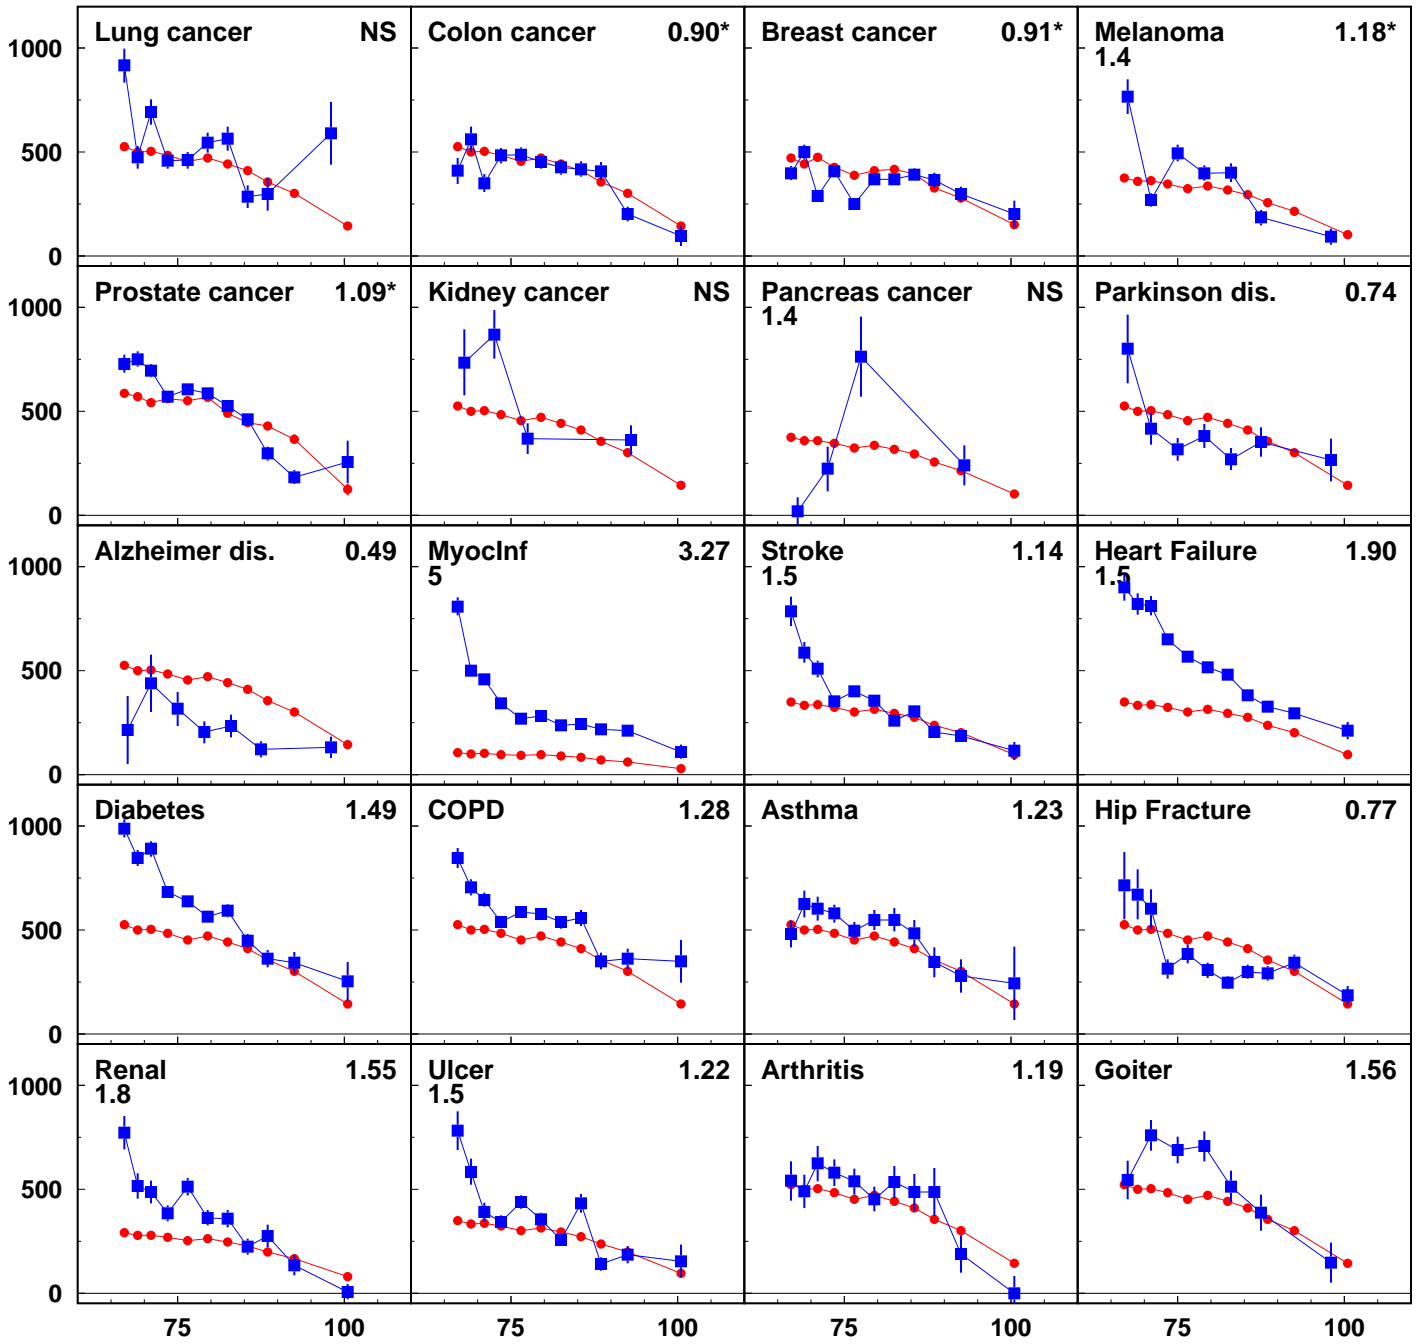

# Stroke

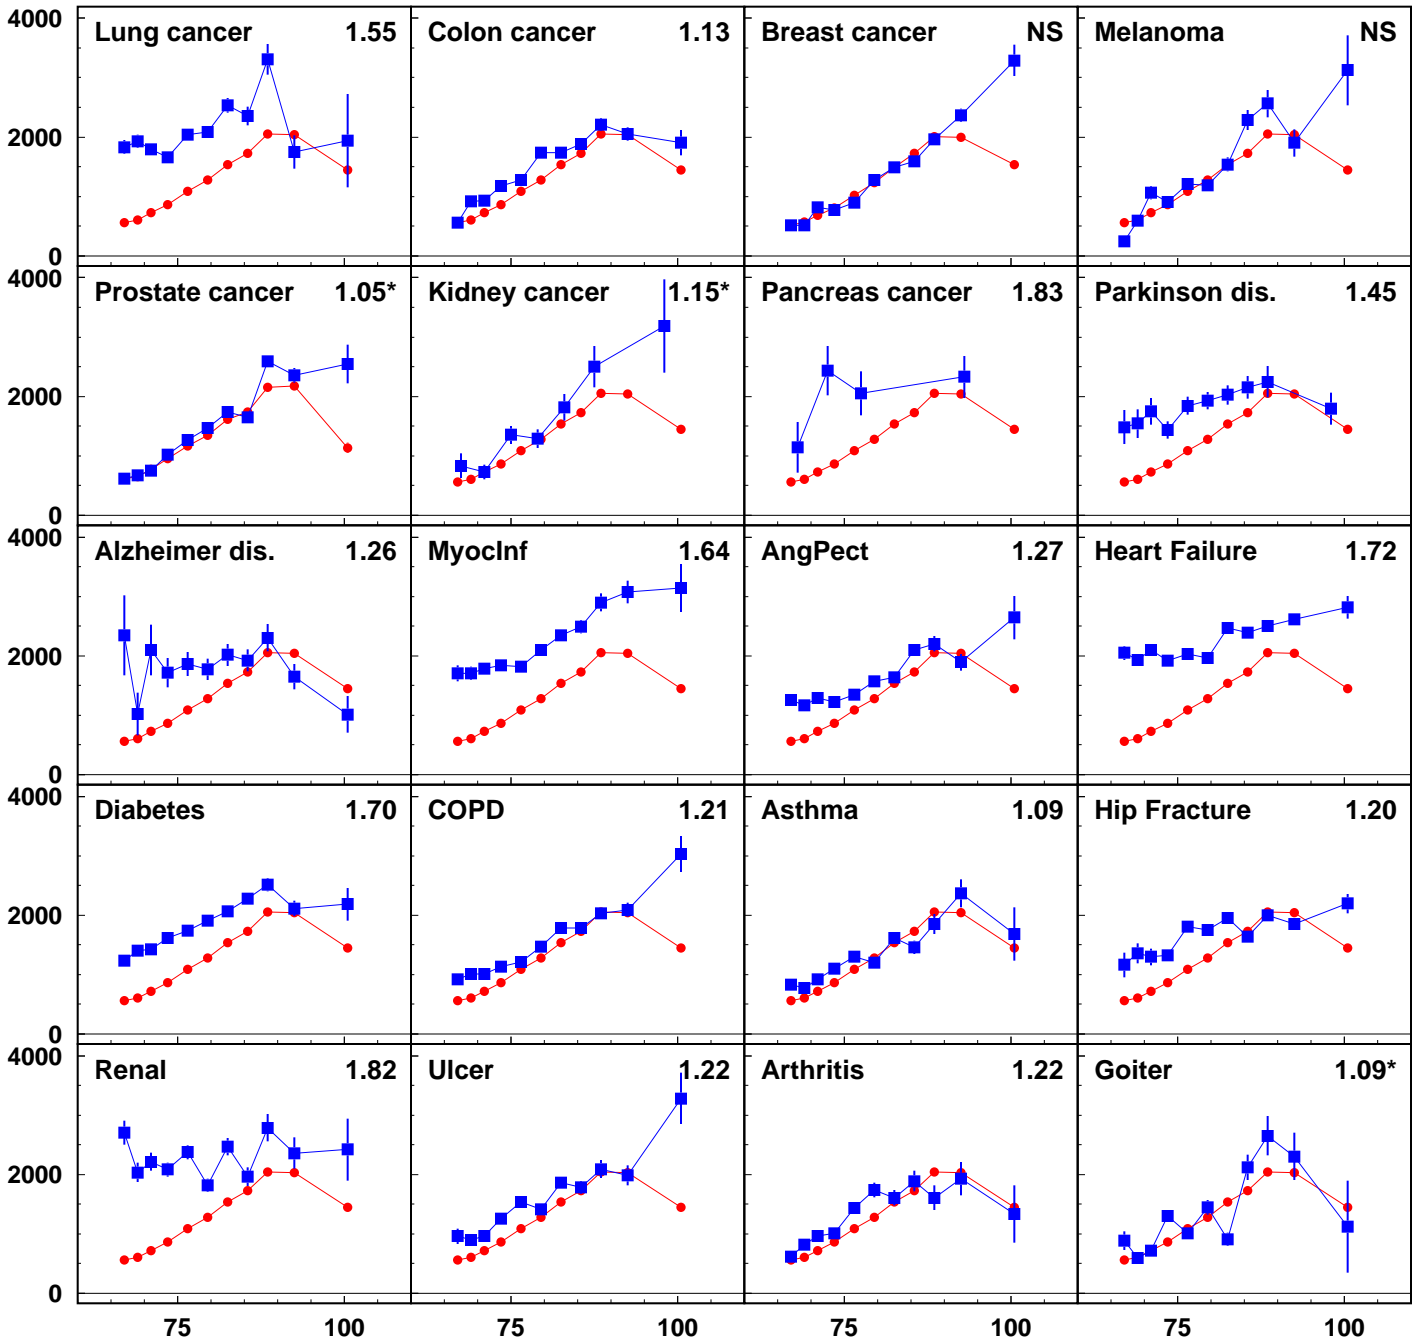

# Heart Failure

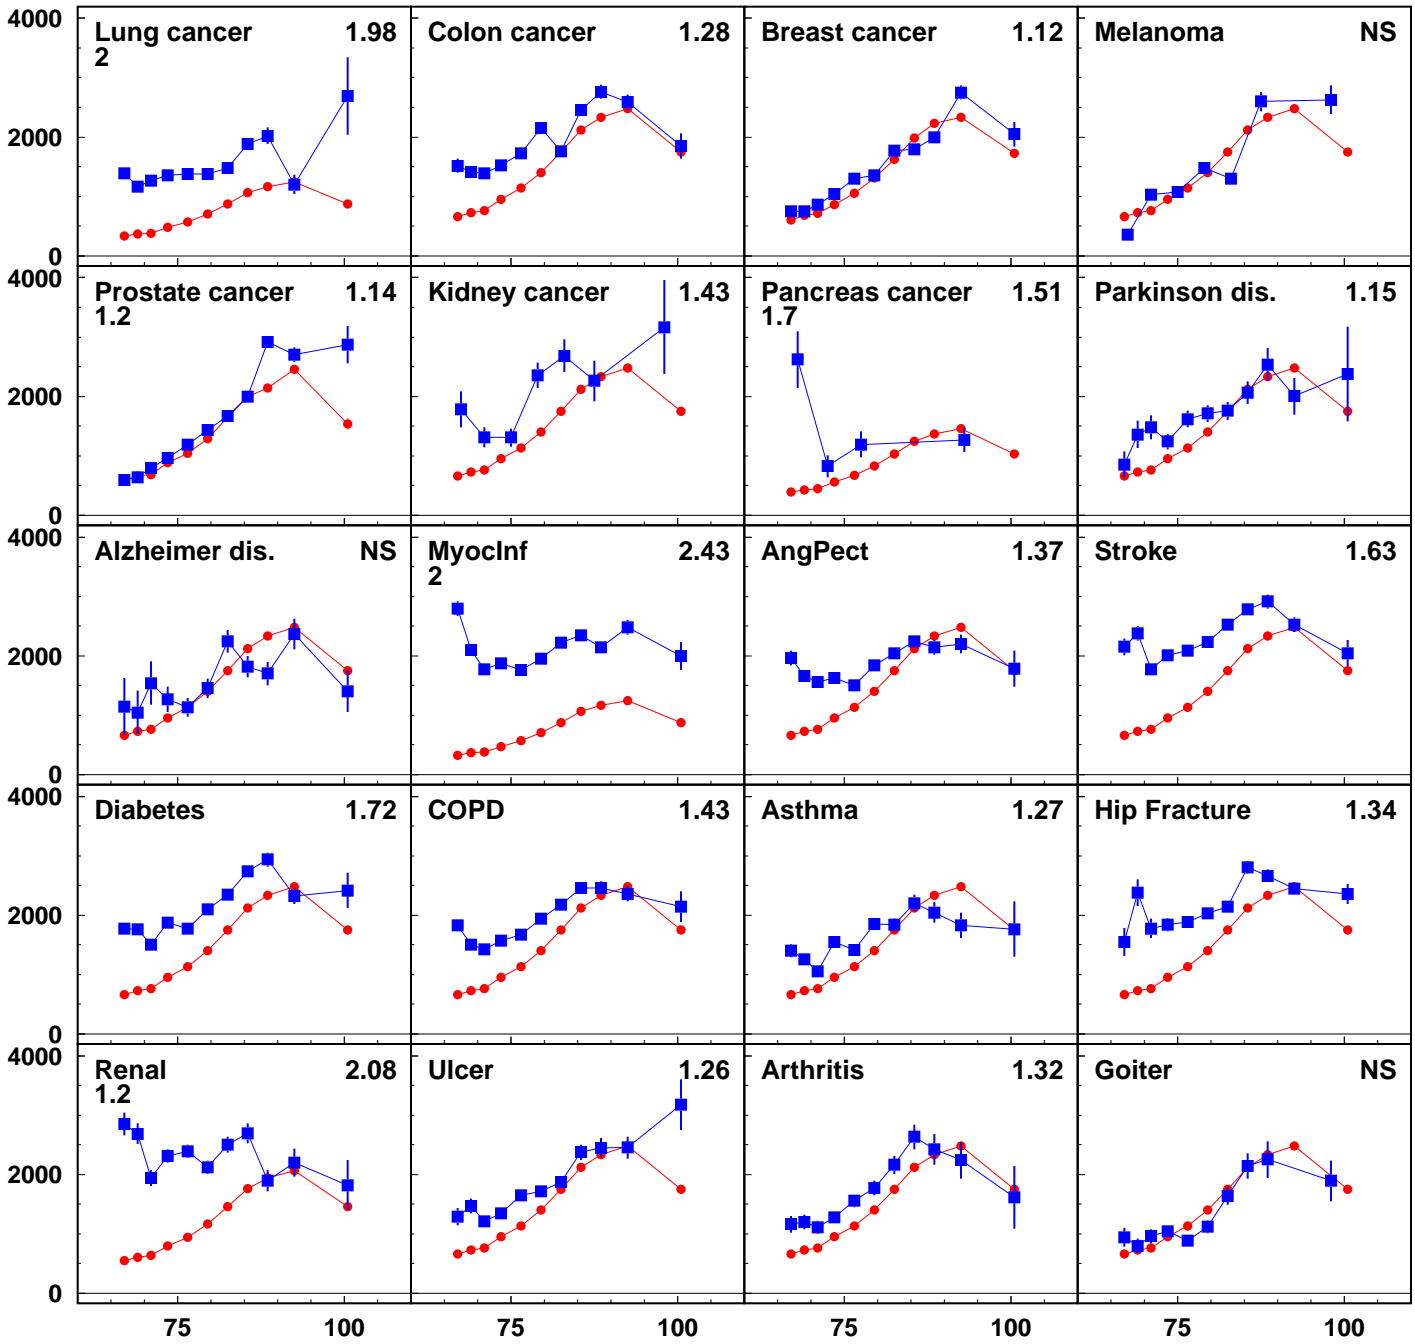

# Diabetes

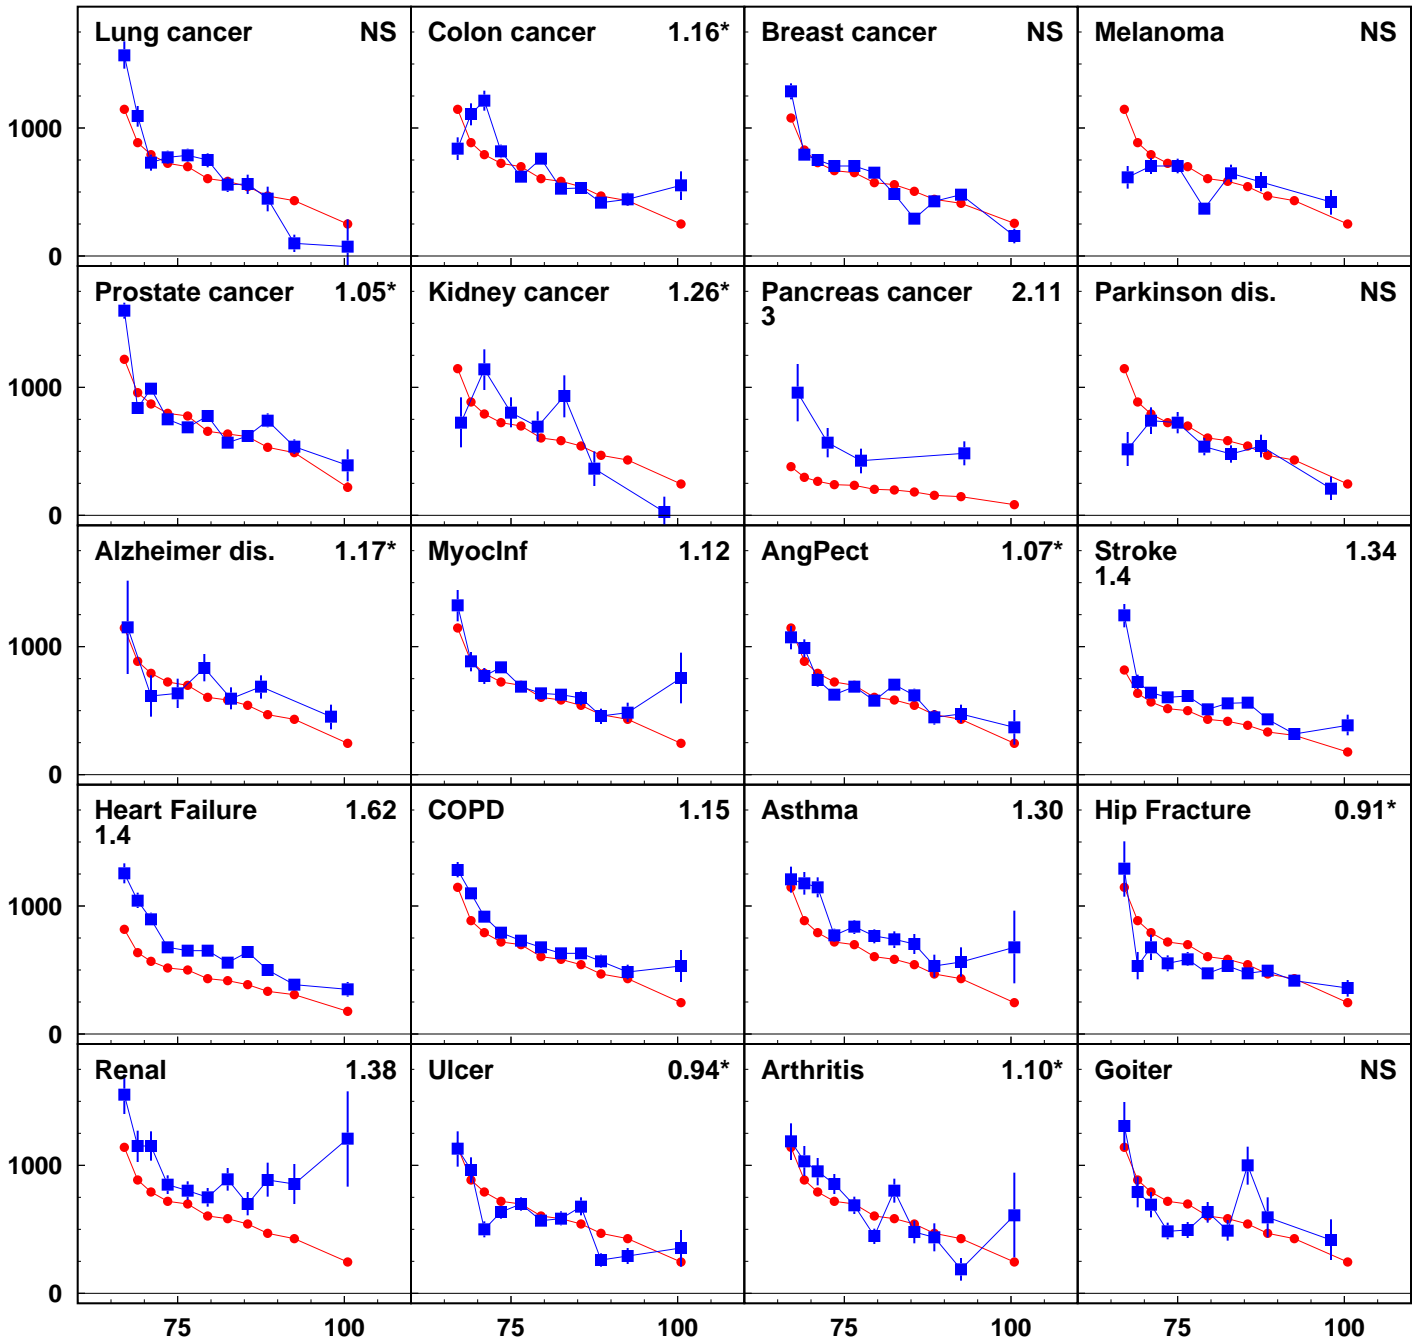

# COPD

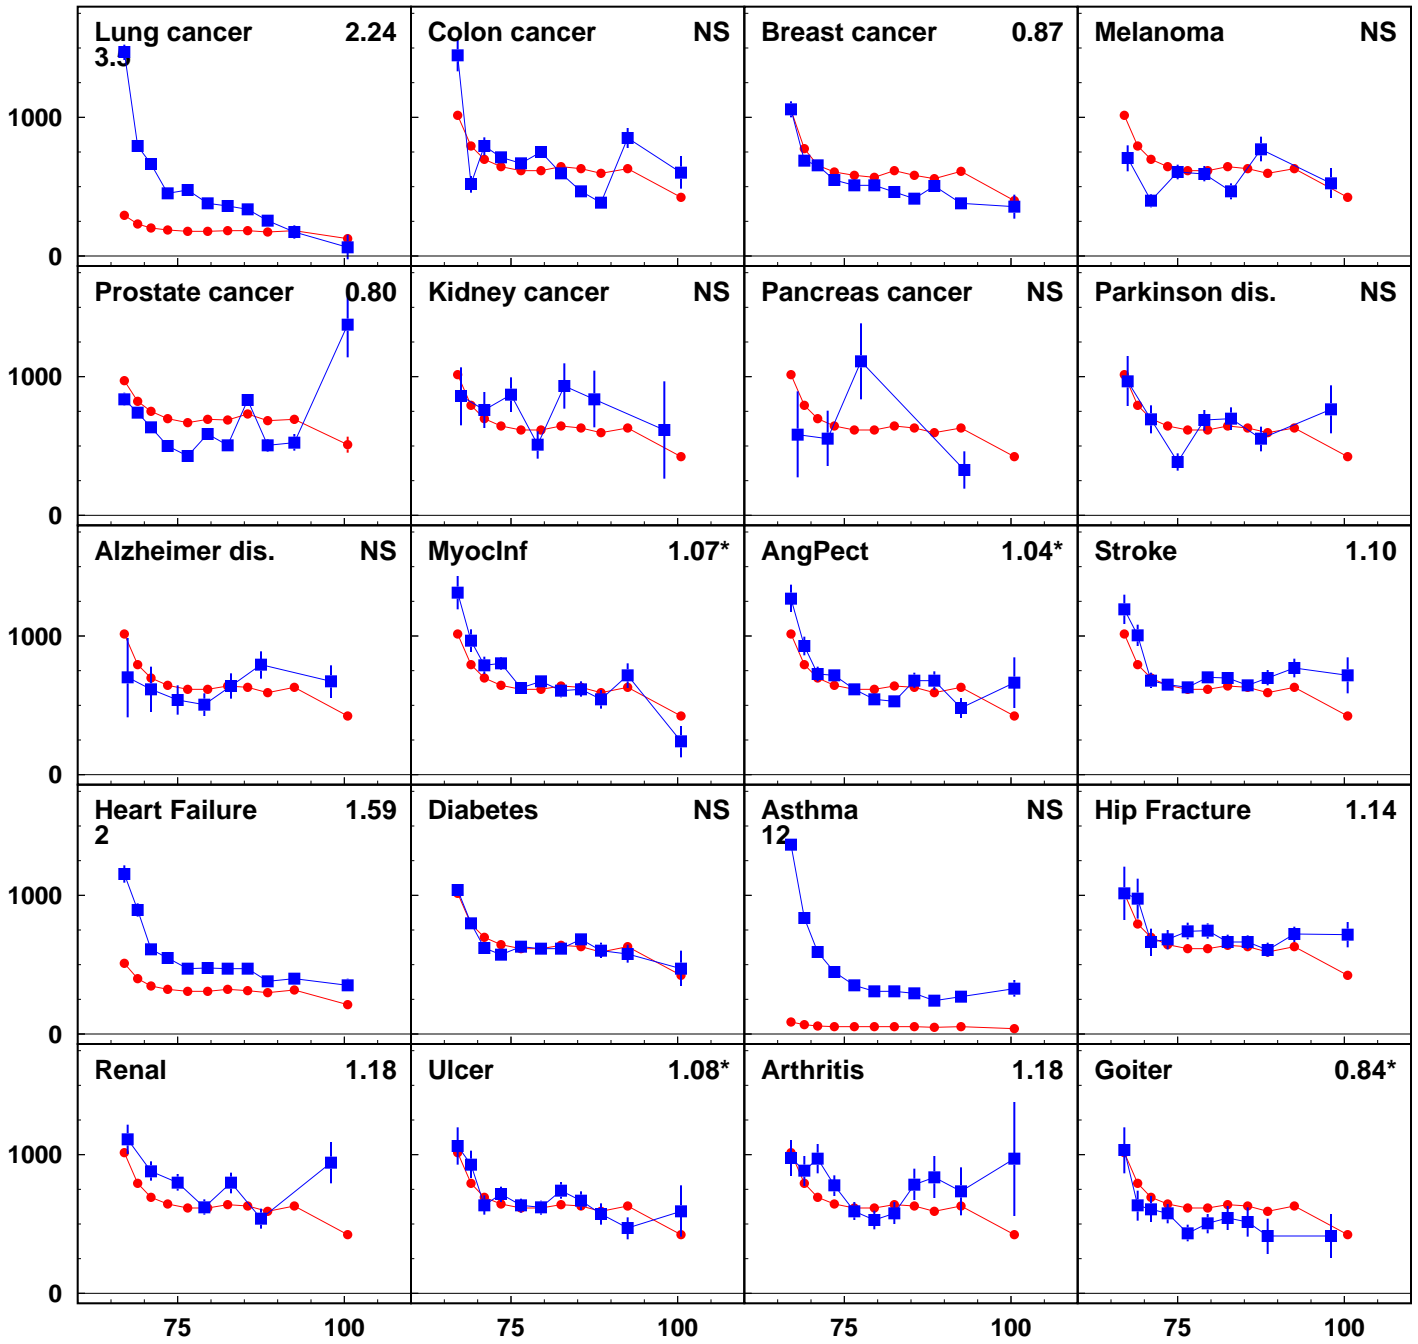

# Asthma

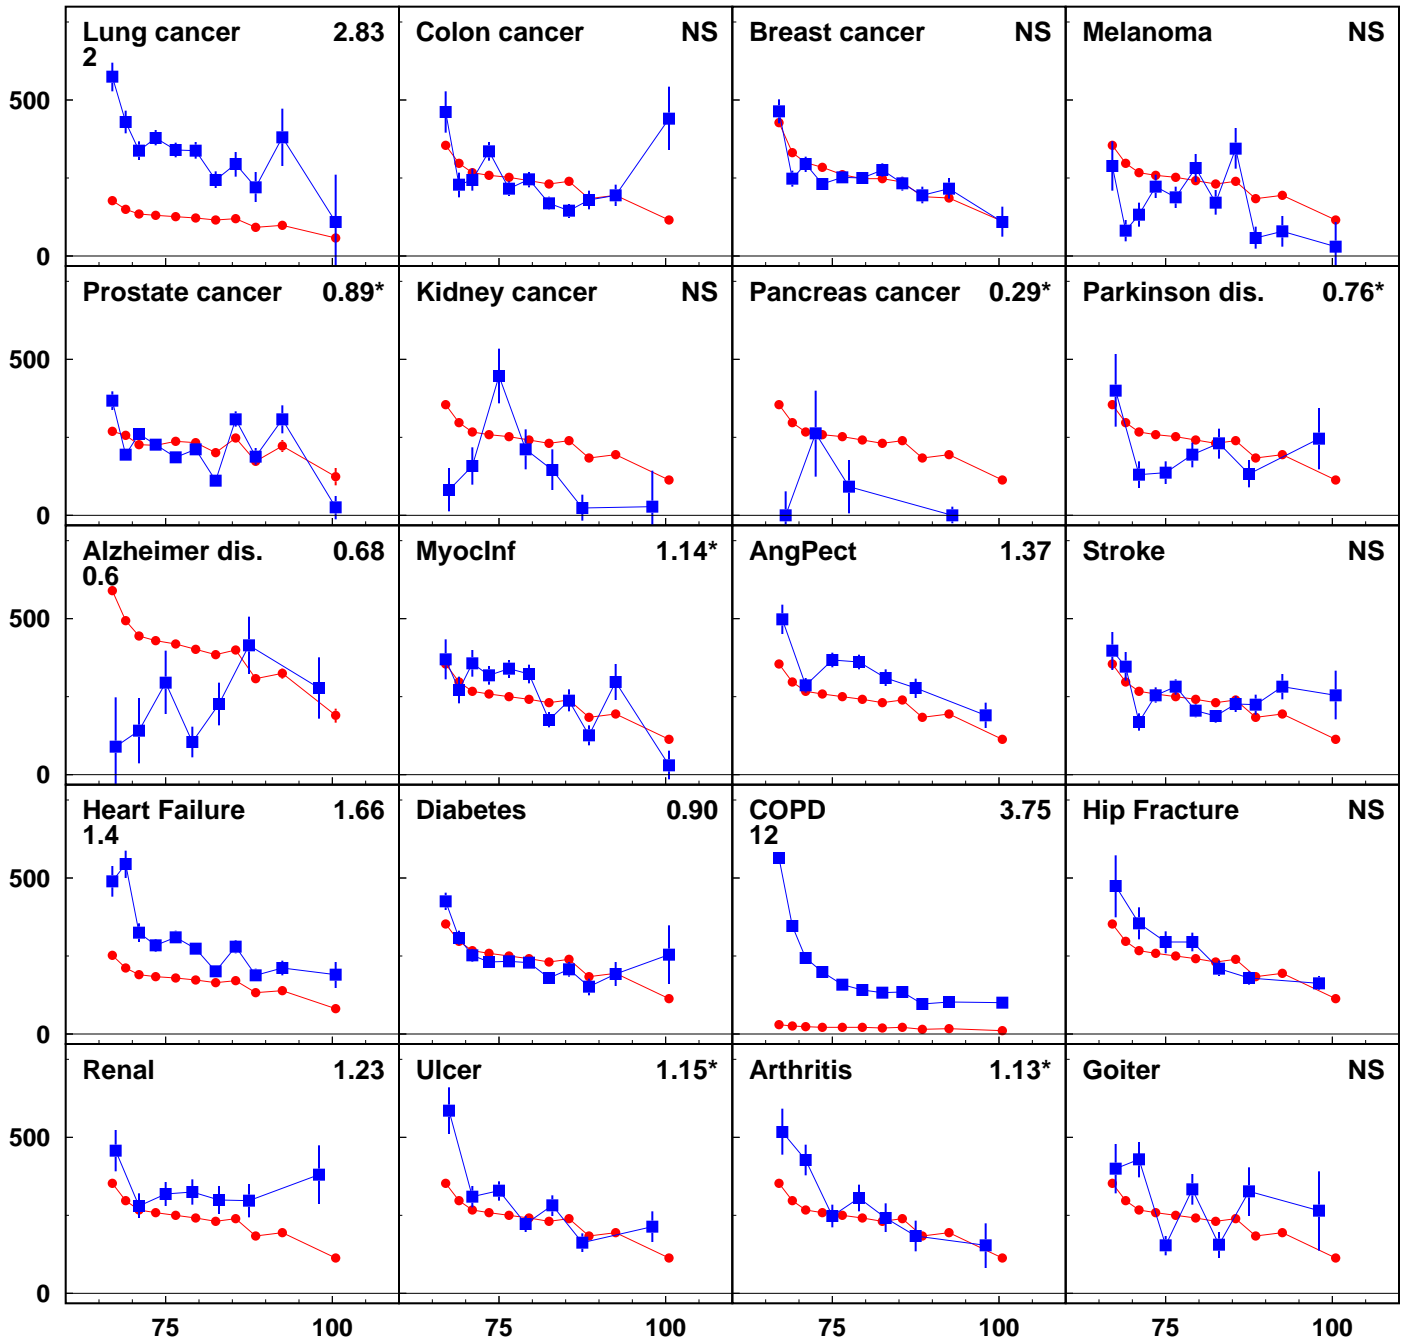



# Hip Fracture

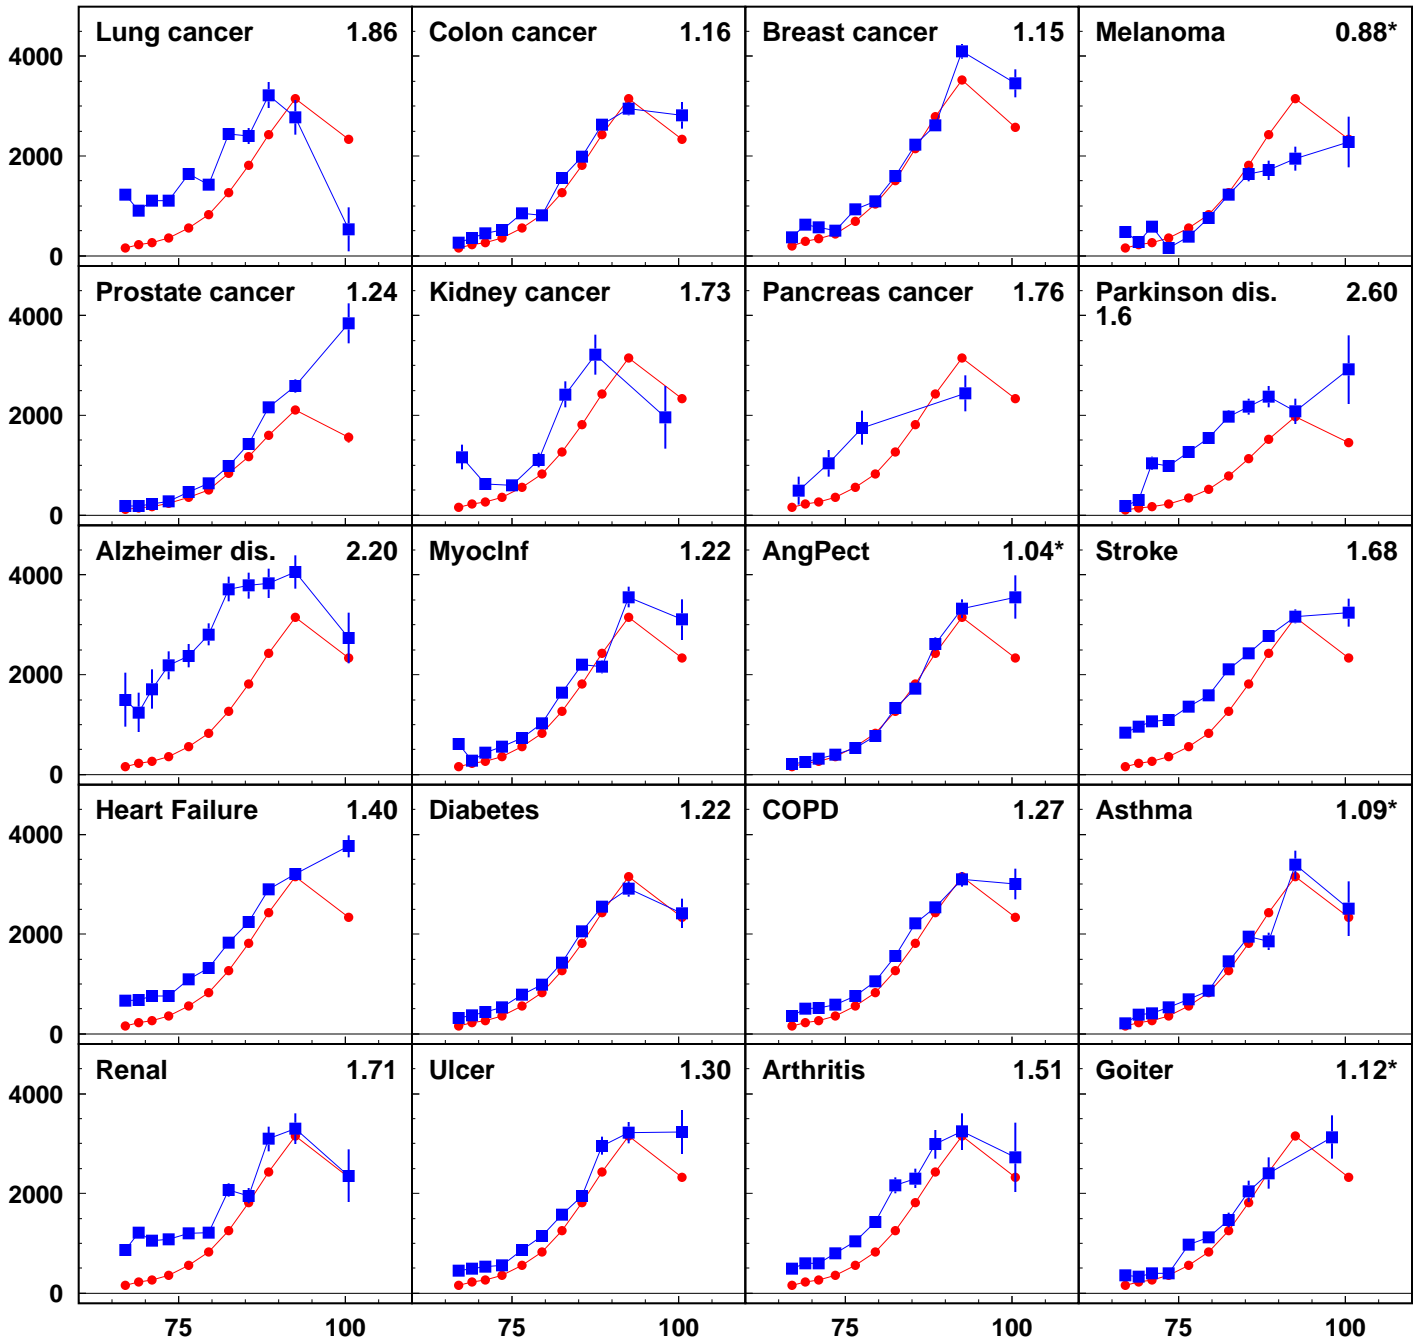

## Renal

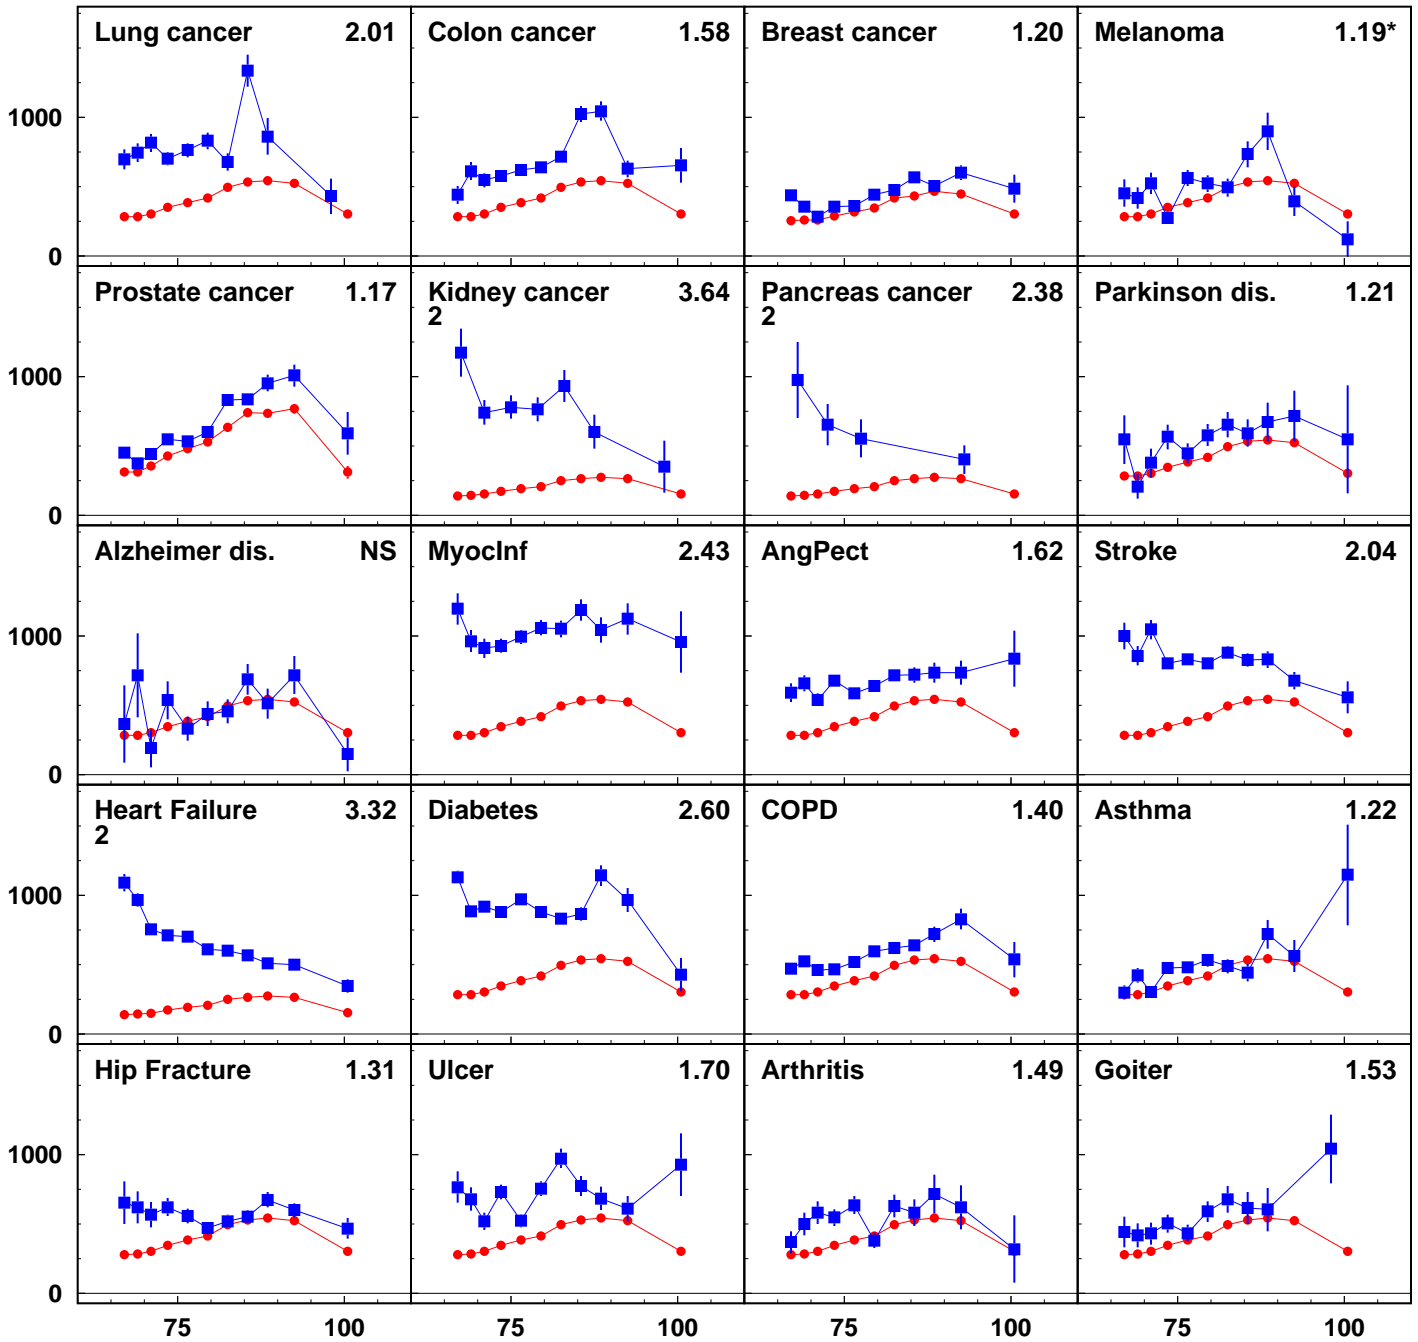

# Ulcer

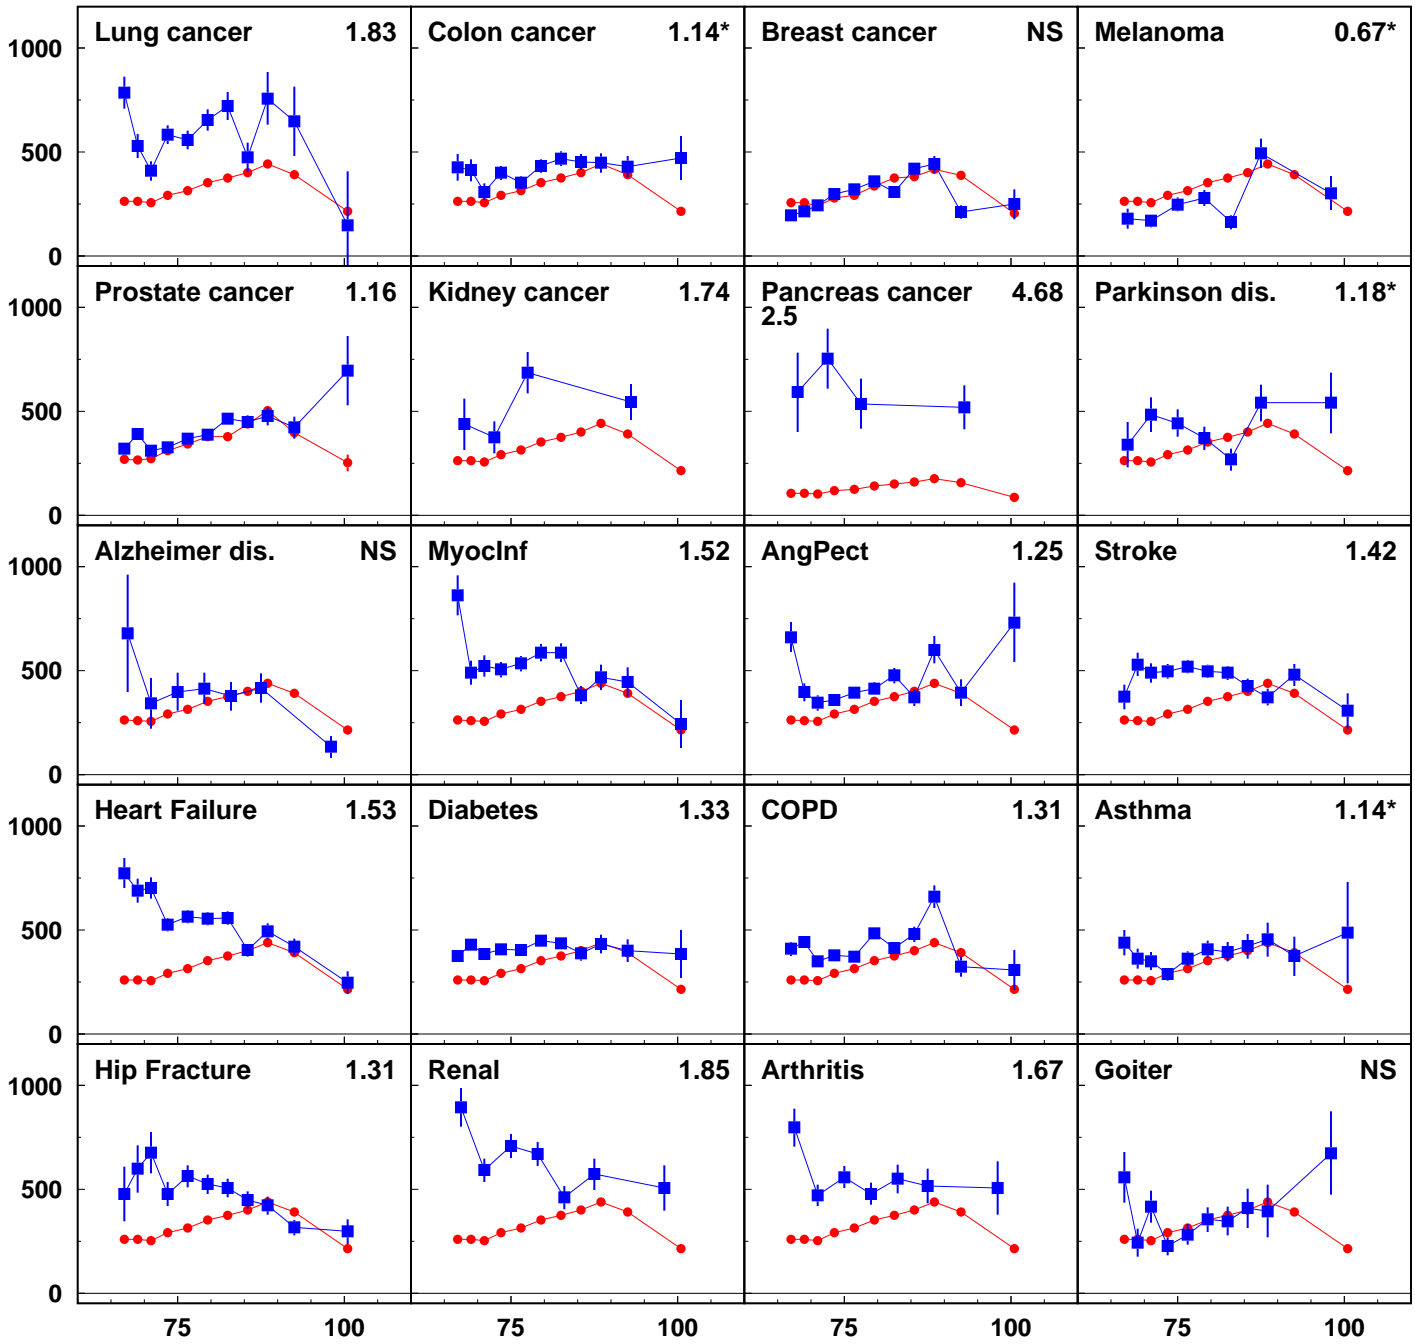

# Arthritis

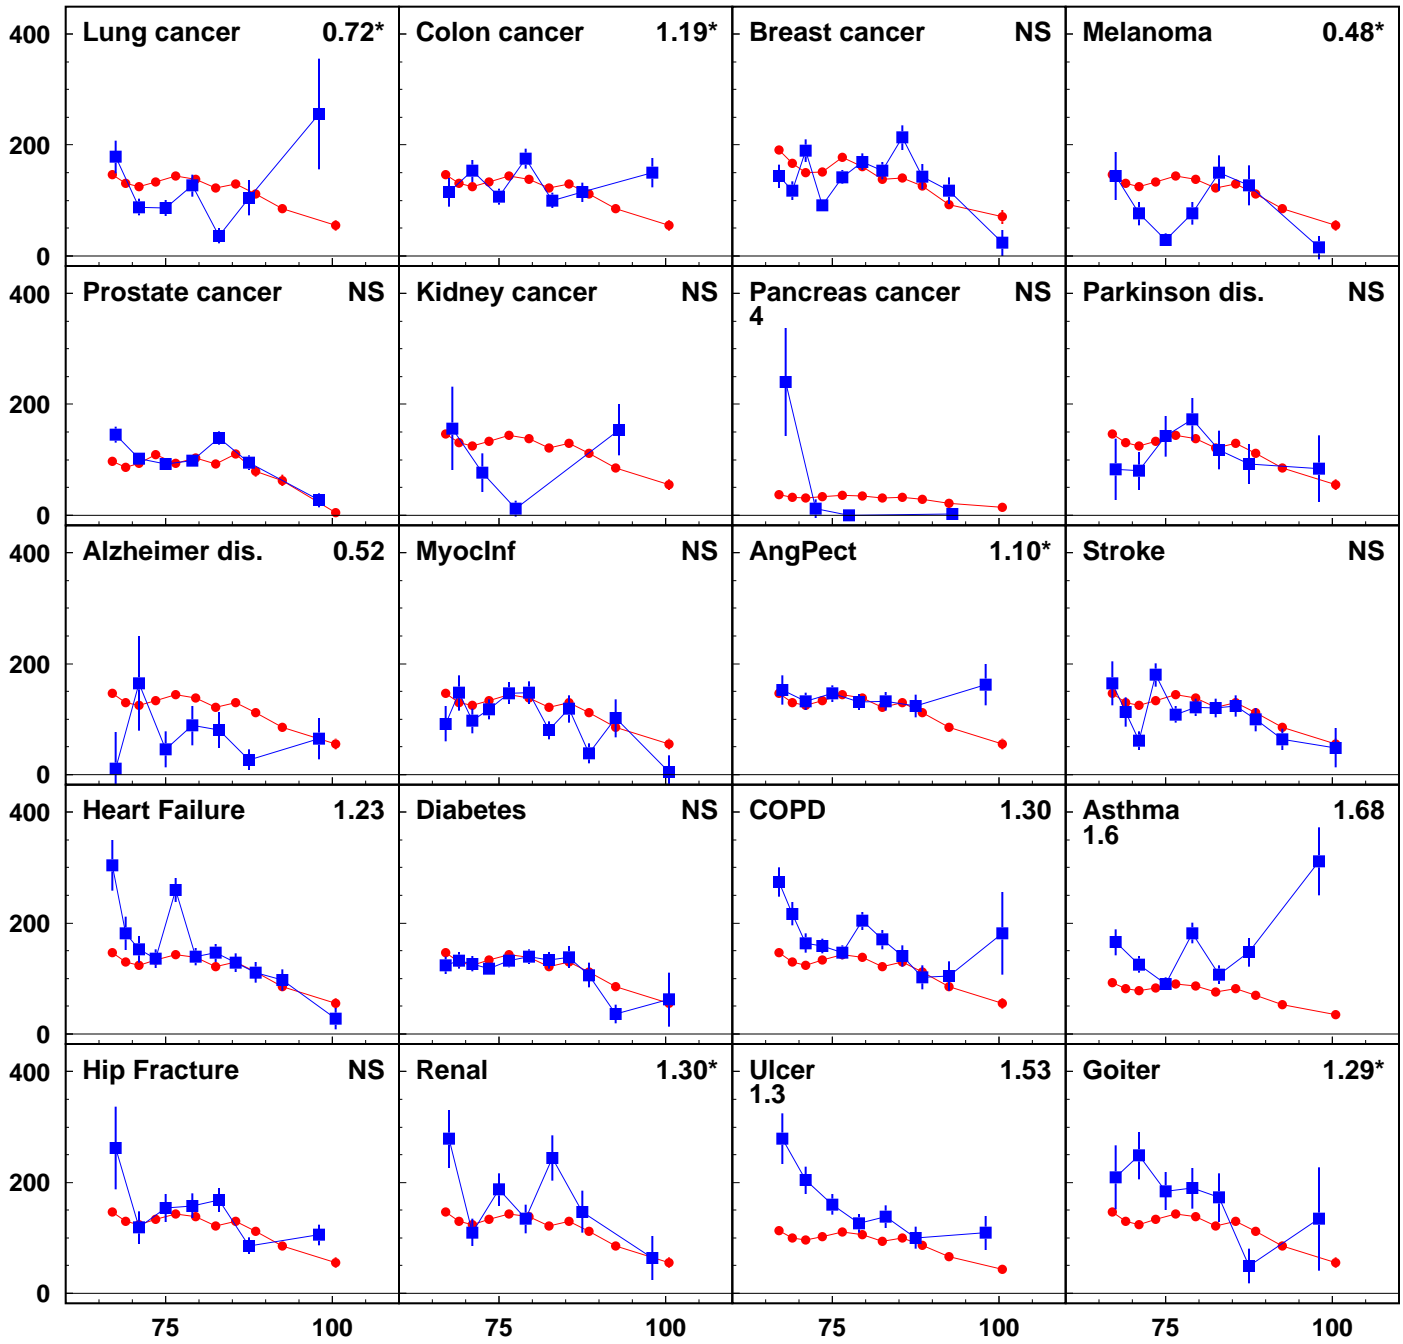

# Goiter

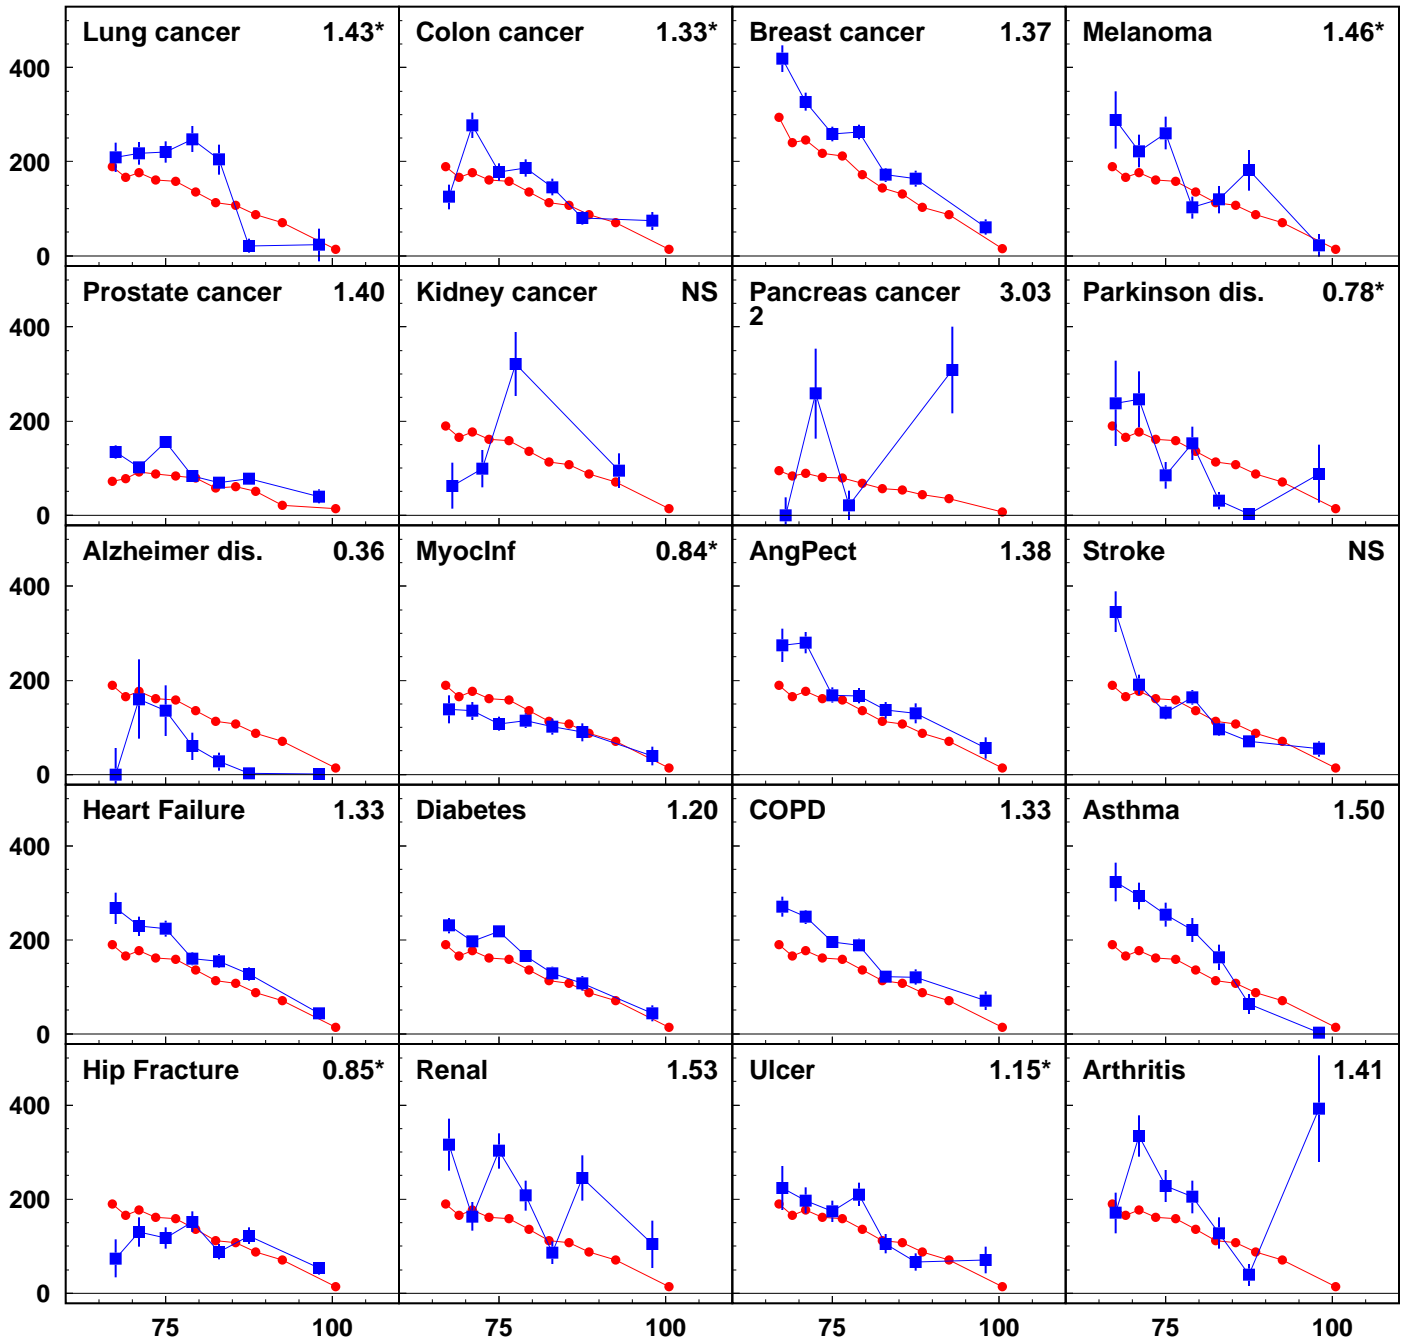

Supplement: NIHMS526869-supplement-02.pdf [file NIHMS526869-supplement-02.pdf]
