# Supplementary material
Source: PubMed Central journal article supplement (PMC3895485)
Supplement: NIHMS526869-supplement-01.pdf [file NIHMS526869-supplement-01.pdf]

**Supplementary Table 1.** The ICD-9 codes used for the 21 conditions of interest

| Group of diseases           | Disease with ICD-9 codes                                                                                                                                                                                               |
|-----------------------------|------------------------------------------------------------------------------------------------------------------------------------------------------------------------------------------------------------------------|
| Cardio- and cerebrovascular | Myocardial infarction (410.xx), angina pectoris (413.xx), stroke (431.xx, 433.x1, 434.x1, 436.xx), heart failure (428.xx)                                                                                              |
| Malignancies                | Lung cancer (162.xx), colon cancer (153.xx), breast cancer (females) (174.xx), prostate cancer (185.xx), skin melanoma (172.xx), kidney cancer (189.xx), pancreas cancer (157,xx)                                      |
| Neurodegenerative           | Parkinson's disease (332.xx), Alzheimer's disease (331.0)                                                                                                                                                              |
| Pulmonary                   | Chronic obstructive pulmonary disease (COPD) <sup>§</sup> (490.xx, 491.xx, 492.xx, 493.xx, 494.xx, 495.xx, 496.xx), asthma (493.xx)                                                                                    |
| Bones/skeletal              | Hip fracture (820.xx, 821.xx)                                                                                                                                                                                          |
| Endocrine and metabolic     | Diabetes mellitus (250.xx), goiter (240.xx, 241.xx, 242.0x, 242.1x, 242.2x, 242.3x)                                                                                                                                    |
| Miscellaneous               | Chronic renal diseases with renal failure (403.xx, 404.xx, 581.xx, 582.xx, 583.xx, 585.xx, 586.xx, 587.xx, 588.xx, 250.4x, 249.4x), ulcer (531.xx, 532.xx, 533.xx, 534.xx), arthritis (714.0x, 714.1x, 714.2x, V82.1x) |

§ -- the definition of COPD excluding asthma codes is used for analysis of asthma risk for patients with COPD (Figure 1)
